# Supplementary material for: New 1,2,3-Triazoles from (R)-Carvone: Synthesis, DFT Mechanistic Study and In Vitro Cytotoxic Evaluation
Source: MDPI journal article supplement (doi:10.3390/molecules27030769), 2022-01-25
Supplement: s1 [file s1]

# **New 1,2,3-triazoles from (R)-carvone : Synthesis, DFT mechanistic study and *in vitro* cytotoxic evaluation.**

Ali Oubella<sup>1</sup>, Abdoullah Bimoussa<sup>1</sup>, Abdellah N'ait oussidi<sup>1</sup>, Mourad Fawzi<sup>1</sup>, Aziz Auhmani<sup>1</sup>, Hamid Morjani<sup>2</sup>, Abdelkhalek Riahi<sup>3</sup>, M'hamed Esseffar\*<sup>1</sup>, Carol Parish<sup>4</sup>, My Youssef AitItto\*<sup>1</sup>

## **I- Experimental Supporting Information**

### **Spectral data for product 8:**

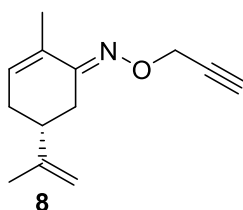

NMR Spectroscopy (500 MHz, CDCl<sub>3</sub>)

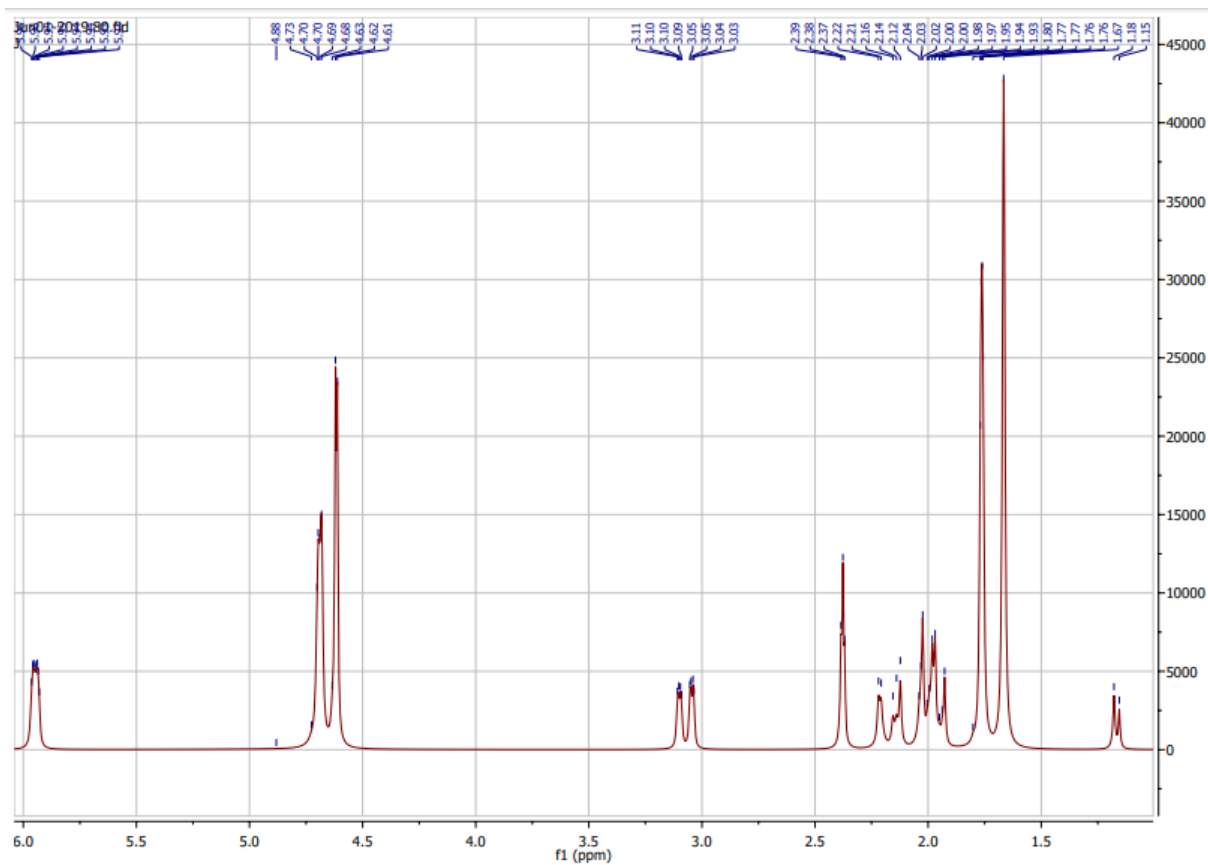

$^1\text{H}$  NMR spectrum

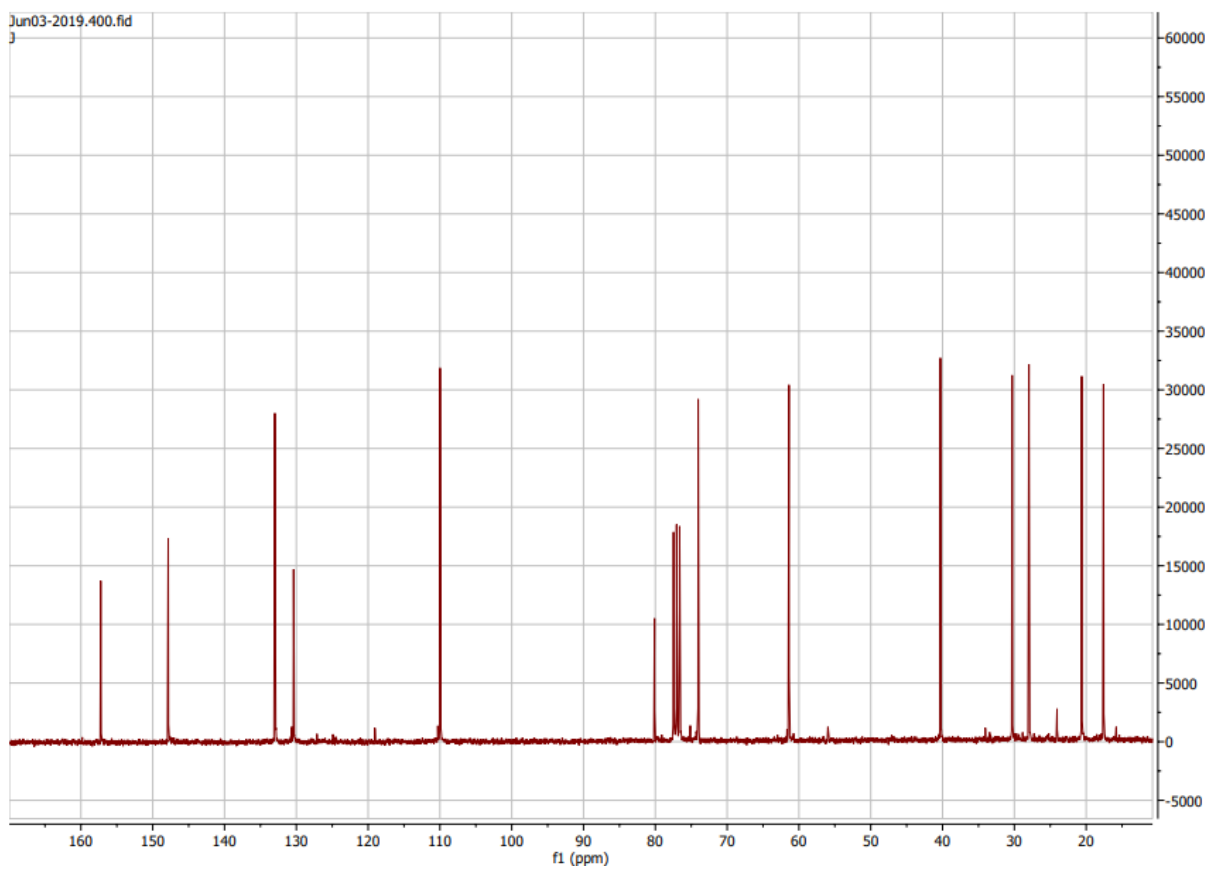

# $^{13}\text{C}$ Decoupled $^1\text{H}$ NMR spectrum

## HRMS spectrum

### Elemental Composition Report

Page 1

#### Single Mass Analysis

Tolerance = 5.0 PPM / DBE: min = -1.0, max = 16.0

Element prediction: Off

Number of isotope peaks used for i-FIT = 4

Monoisotopic Mass, Even Electron Ions

89 formula(e) evaluated with 1 results within limits (all results (up to 1000) for each mass)

Elements Used:

C: 0-500 H: 0-1000 N: 0-4 O: 0-6

AB120

1.6

11-Dec-2019

1912123 546 (3.303) Cm (545.549-(495.501+628.633))

1: TOF MS ES+  
7.00e+002

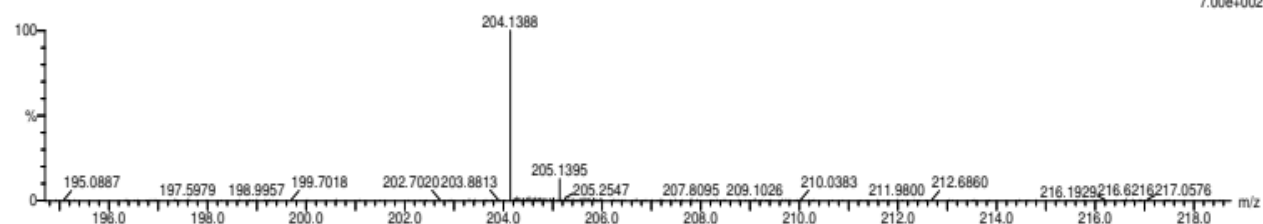

Minimum: -1.0  
Maximum: 5.0 5.0 16.0

| Mass     | Calc. Mass | mDa | PPM | DBE | i-FIT | i-FIT (Norm) | Formula     |
|----------|------------|-----|-----|-----|-------|--------------|-------------|
| 204.1388 | 204.1388   | 0.0 | 0.0 | 5.5 | 163.8 | 0.0          | C13 H18 N O |

## Spectral data for 123-triazole-Carvone9a-h:

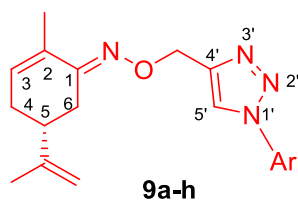

- 9a** : Ar= C<sub>6</sub>H<sub>5</sub>  
**9b** : Ar= 4-CH<sub>3</sub>-C<sub>6</sub>H<sub>4</sub>  
**9c** : Ar= 4-Cl-C<sub>6</sub>H<sub>4</sub>  
**9d** : Ar= 4-NO<sub>2</sub>-C<sub>6</sub>H<sub>4</sub>  
**9e** : Ar= 2-CH<sub>3</sub>-C<sub>6</sub>H<sub>4</sub>  
**9f** : Ar= 2-CH<sub>3</sub>-4Cl-C<sub>6</sub>H<sub>3</sub>  
**9g** : Ar= 4-F-C<sub>6</sub>H<sub>4</sub>  
**9h** : Ar= C<sub>6</sub>H<sub>5</sub>-CH<sub>2</sub>

## 1,2,3-triazole-Carvone 9a:

NMR Spectroscopy (500 MHz, CDCl<sub>3</sub>)

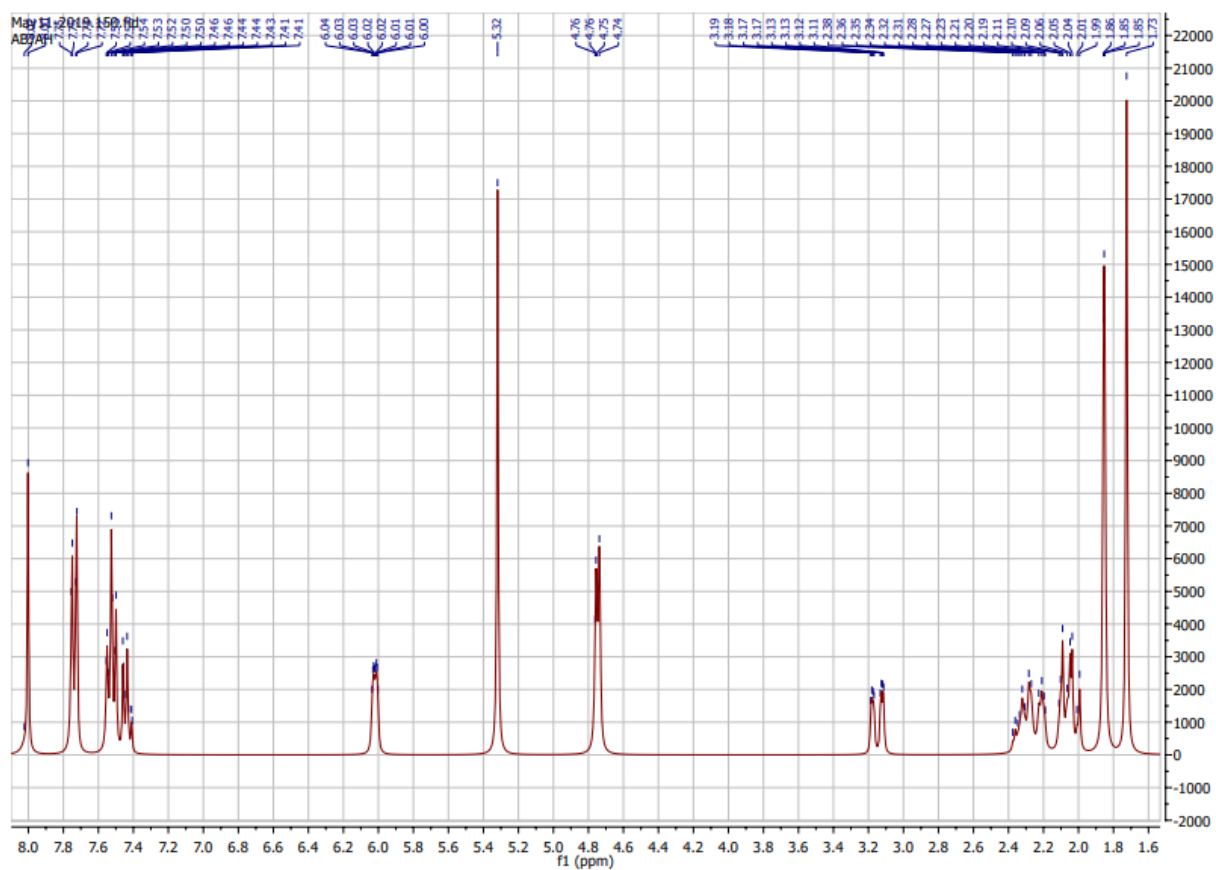

<sup>1</sup>H NMR spectrum

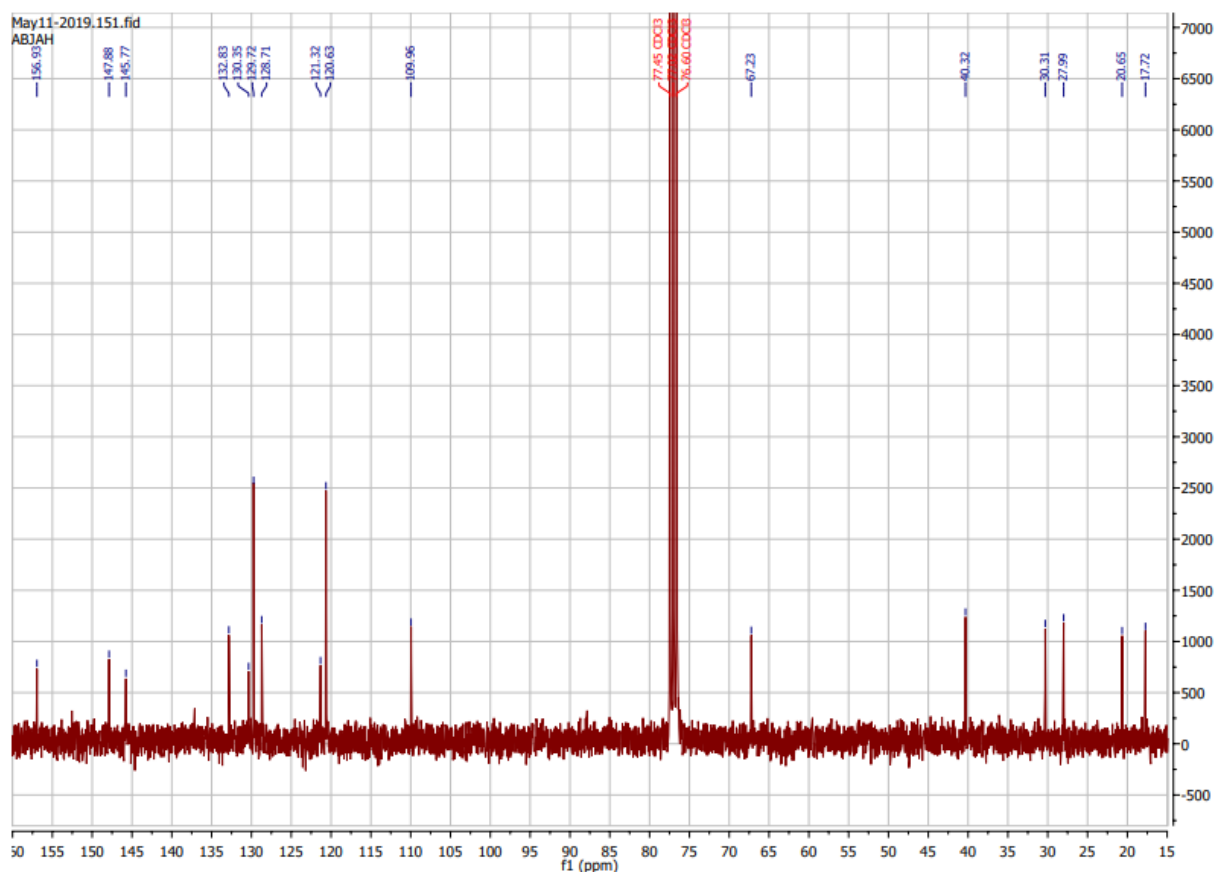

$^{13}\text{C}$  Decoupled  $^1\text{H}$  NMR spectrum

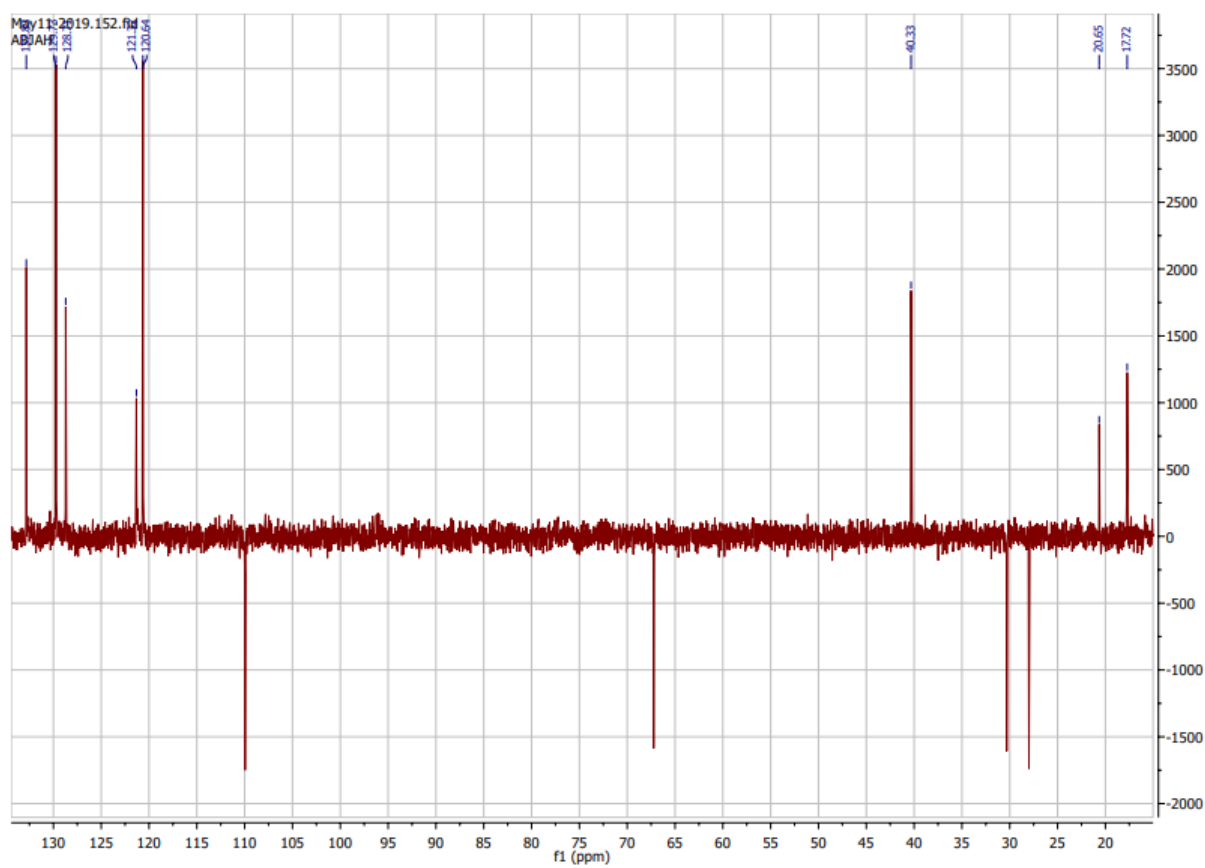

# $^{13}\text{C}$ Decoupled $^1\text{H}$ NMR spectrum DEPT 135 Mode

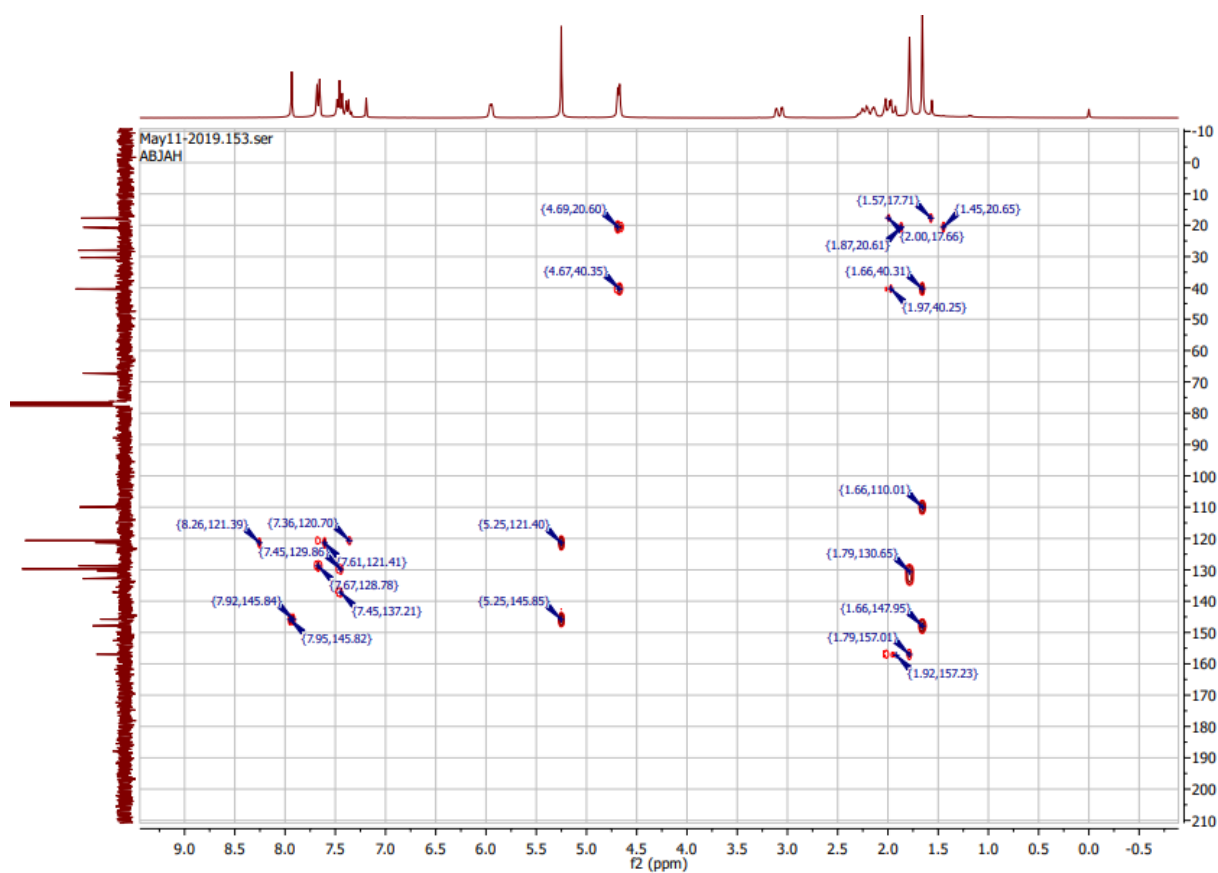

## HMBC Spectrum

## HRMS spectrum

### Elemental Composition Report

Page 1

#### Single Mass Analysis

Tolerance = 5.0 PPM / DBE: min = -1.0, max = 16.0

Element prediction: Off

Number of isotope peaks used for i-FIT = 4

Monoisotopic Mass, Even Electron Ions

143 formula(e) evaluated with 2 results within limits (all results (up to 1000) for each mass)

Elements Used:

C: 0-500 H: 0-1000 N: 0-4 O: 0-6

11-Dec-2019

1912124 571 (3.451) Cm (571:574-(513:515+647))

AB121

1:7

1: TOF MS ES+  
3.91e+003

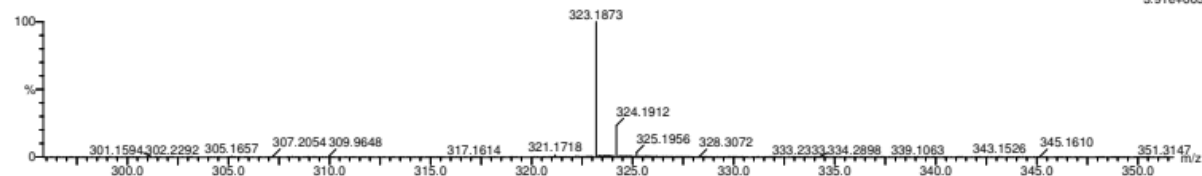

|          |            |     |     |      |       |              |              |  |
|----------|------------|-----|-----|------|-------|--------------|--------------|--|
| Minimum: |            |     |     | -1.0 |       |              |              |  |
| Maximum: |            | 5.0 | 5.0 | 16.0 |       |              |              |  |
| Mass     | Calc. Mass | mDa | PPM | DBE  | i-FIT | i-FIT (Norm) | Formula      |  |
| 323.1873 | 323.1872   | 0.1 | 0.3 | 10.5 | 338.7 | 0.1          | C19 H23 N4 O |  |
|          | 323.1858   | 1.5 | 4.6 | 5.5  | 340.8 | 2.2          | C18 H27 O5   |  |

## 1,2,3-triazole-Carvone 9b:

NMR Spectroscopy (500 MHz, CDCl<sub>3</sub>)

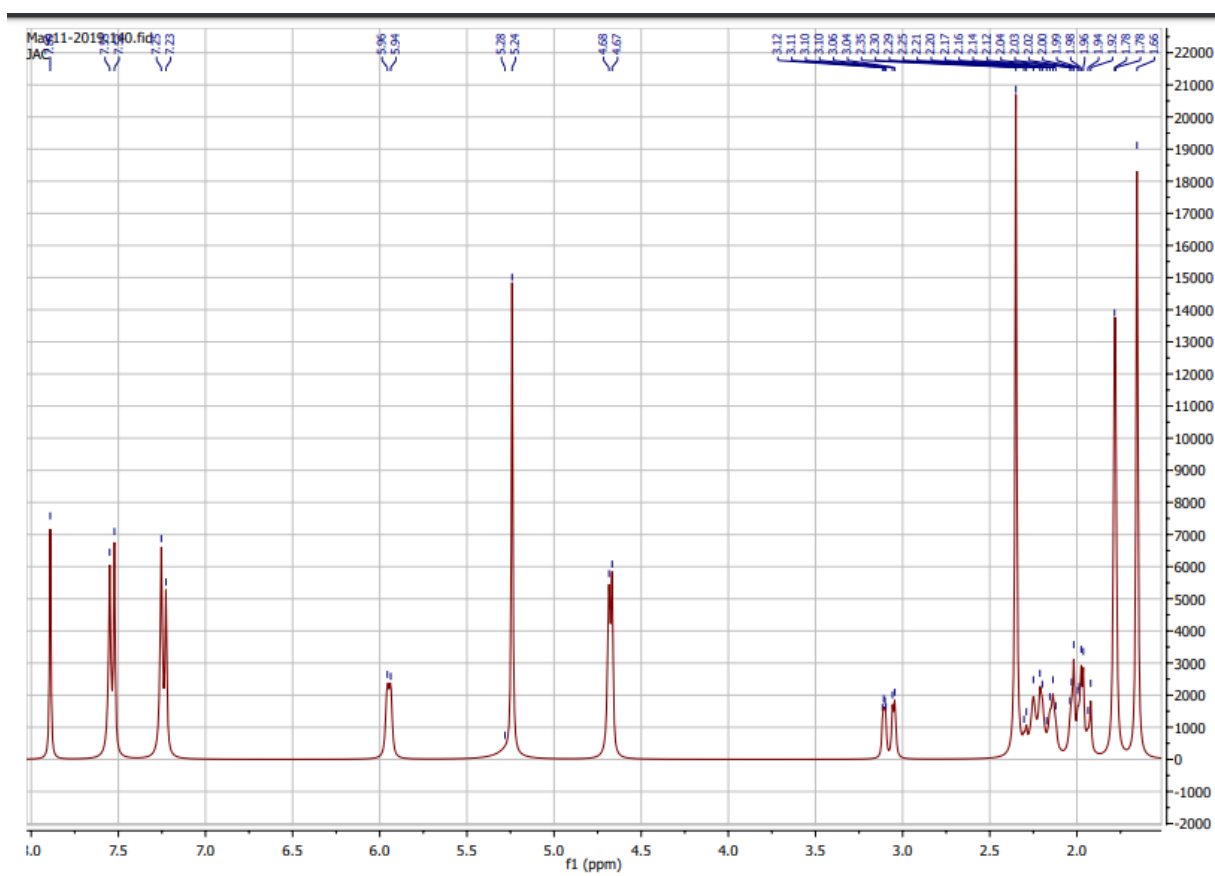

<sup>1</sup>H NMR spectrum

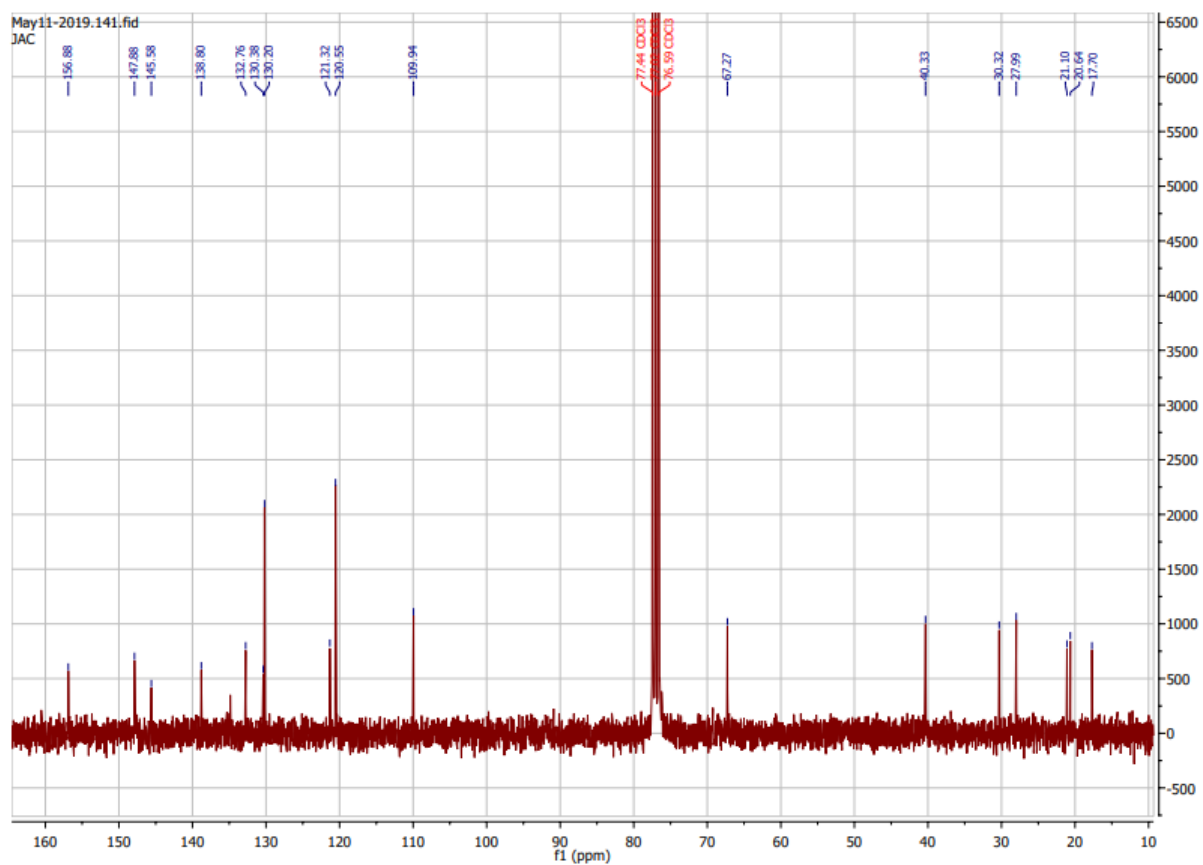

$^{13}\text{C}$  Decoupled  $^1\text{H}$  NMR spectrum

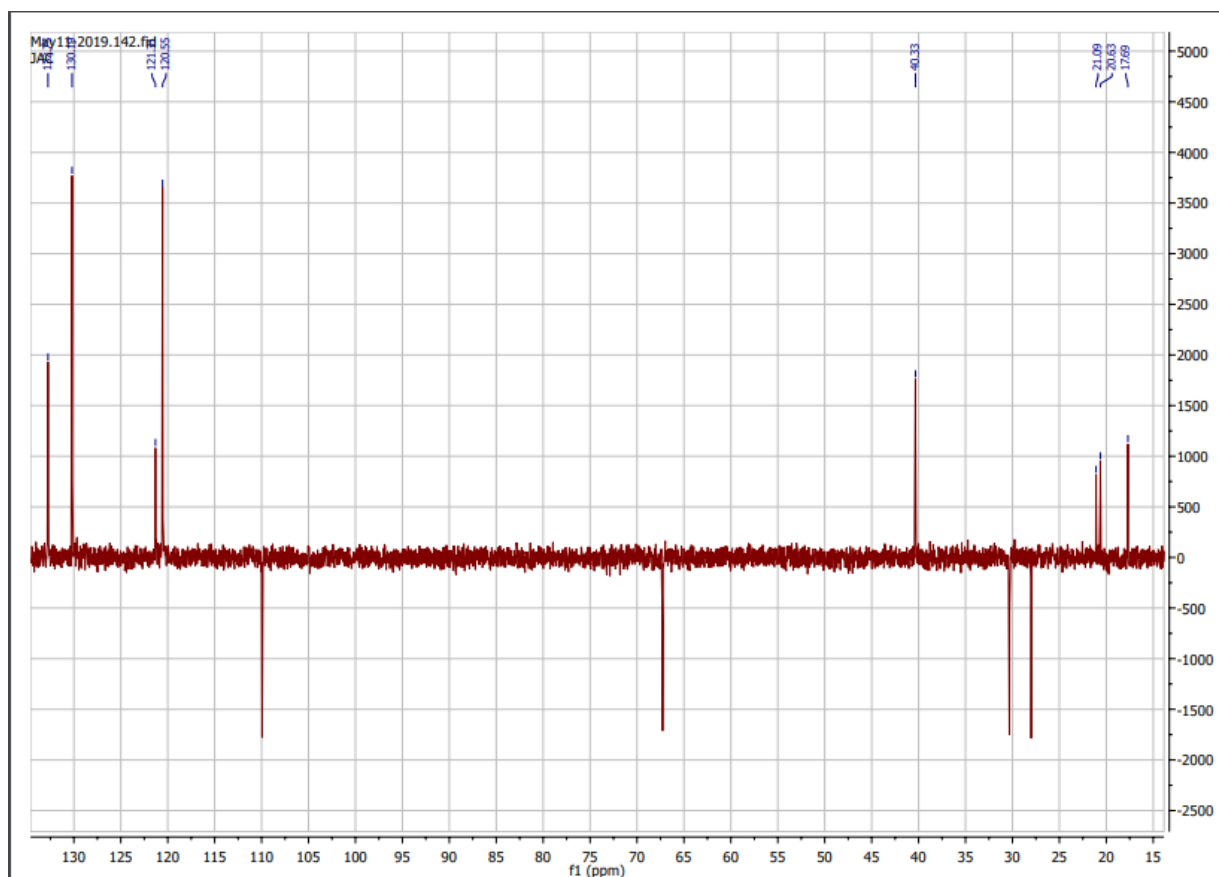



# $^{13}\text{C}$ Decoupled $^1\text{H}$ NMR spectrum DEPT 135 Mode

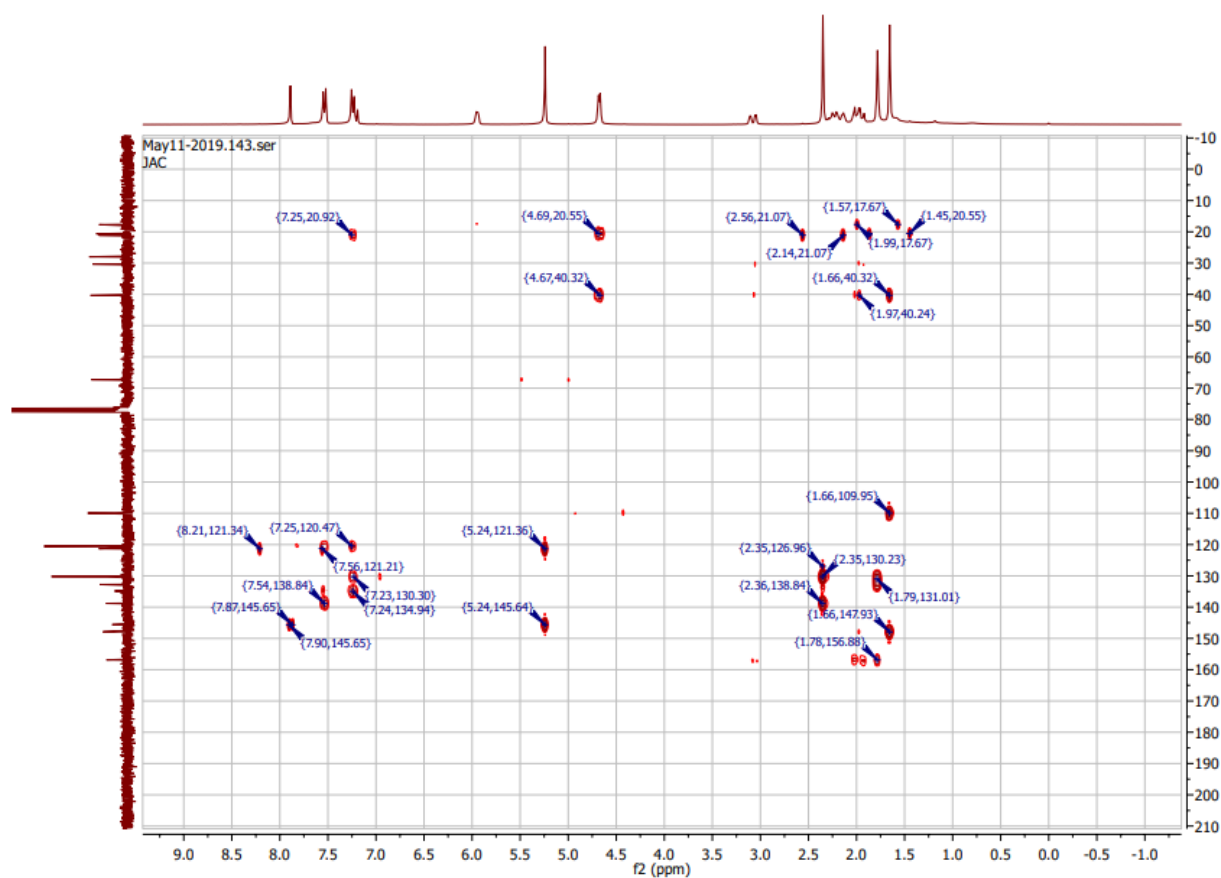

HMBC Spectrum

## HRMS spectrum

### Elemental Composition Report

Page 1

#### Single Mass Analysis

Tolerance = 5.0 PPM / DBE: min = -1.0, max = 16.0

Element prediction: O/H

Number of isotope peaks used for i-FIT = 4

Monoisotopic Mass, Even Electron Ions

112 formula(e) evaluated with 1 results within limits (all results (up to 1000) for each mass)

Elements Used:

C: 0-500 H: 0-1000 N: 0-4 O: 0-4

11-Dec-2019

1912125 618 (3.727) Cm (615:618-(535:542+757:760))

AB122

1:8

1: TOF MS ES+  
5.52e+003

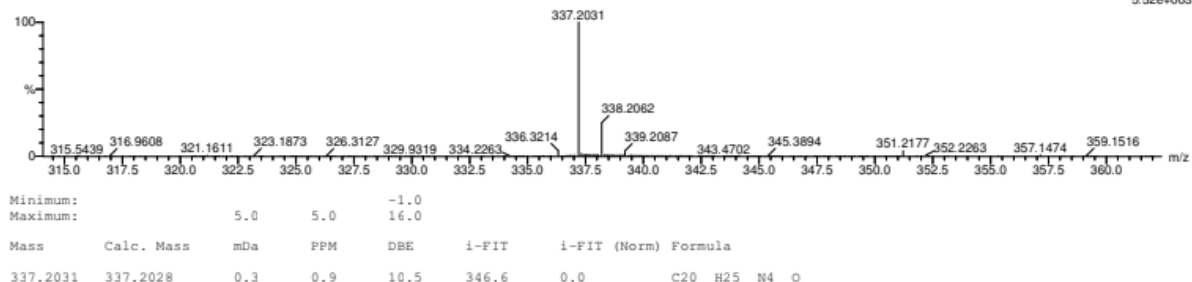

## 1,2,3-triazole-Carvone 9c:

NMR Spectroscopy (500 MHz, CDCl<sub>3</sub>)

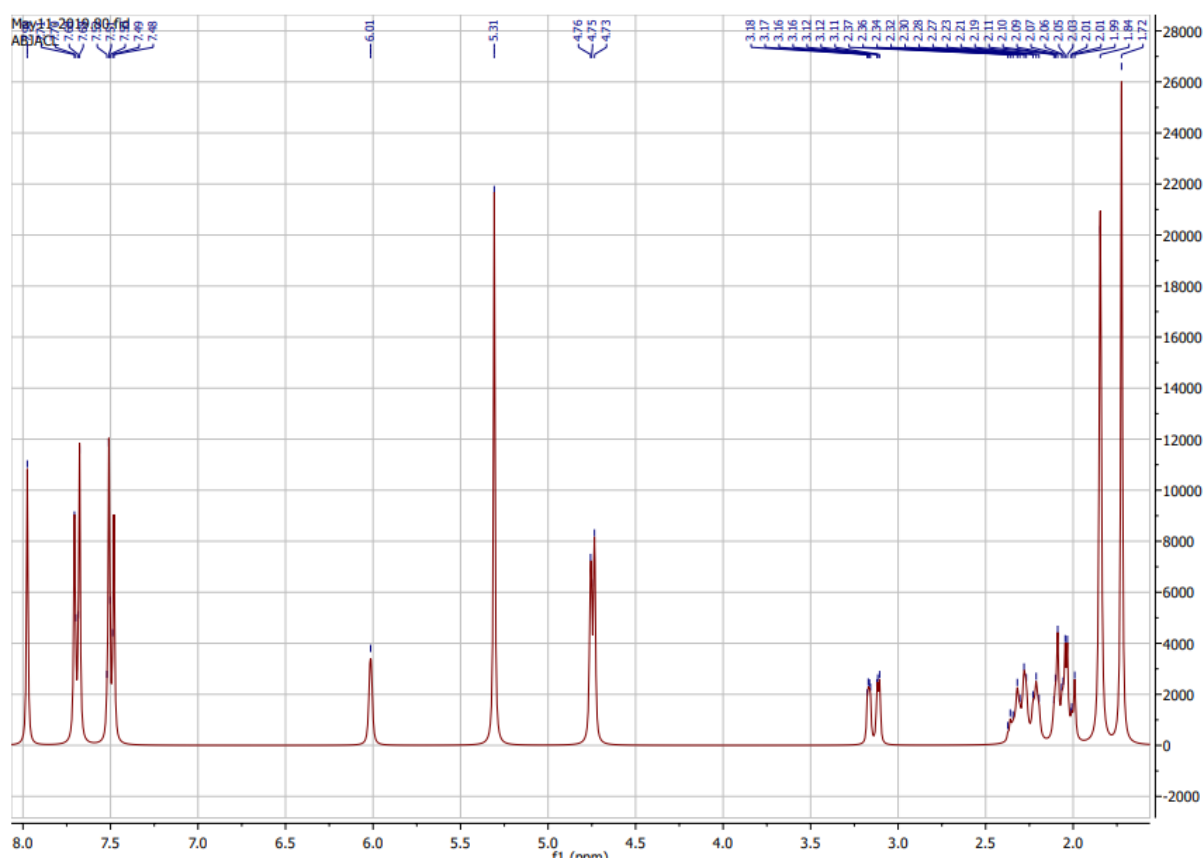

<sup>1</sup>H NMR spectrum

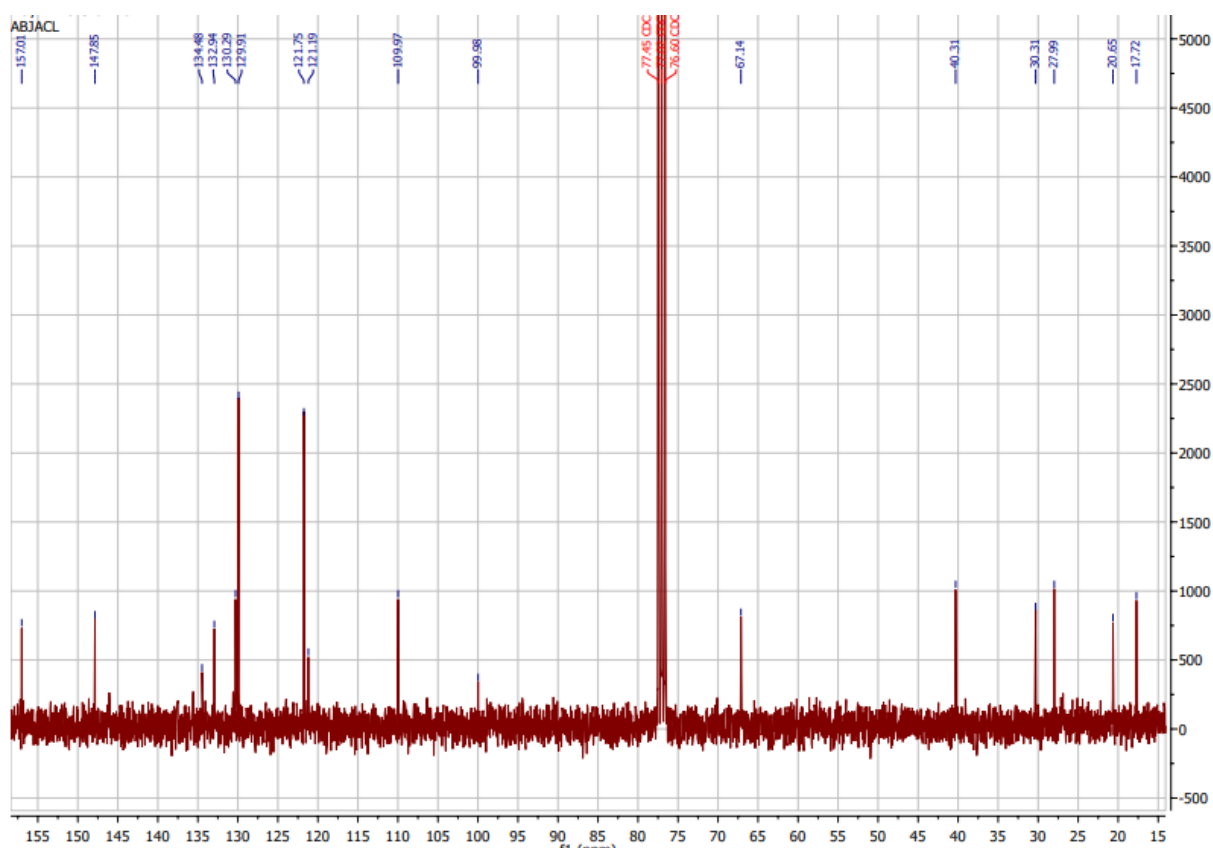

$^{13}\text{C}$  Decoupled  $^1\text{H}$  NMR spectrum

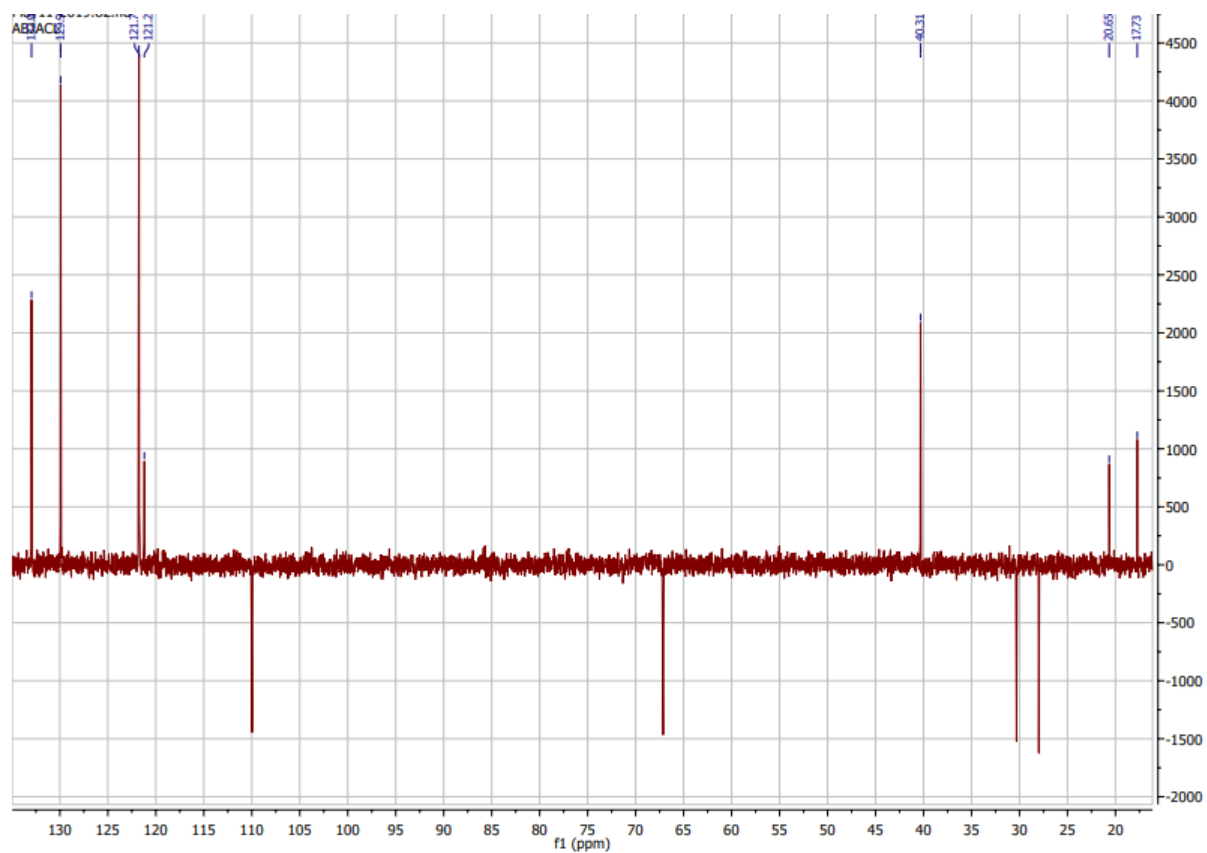

$^{13}\text{C}$  Decoupled  $^1\text{H}$  NMR spectrum DEPT 135 Mode

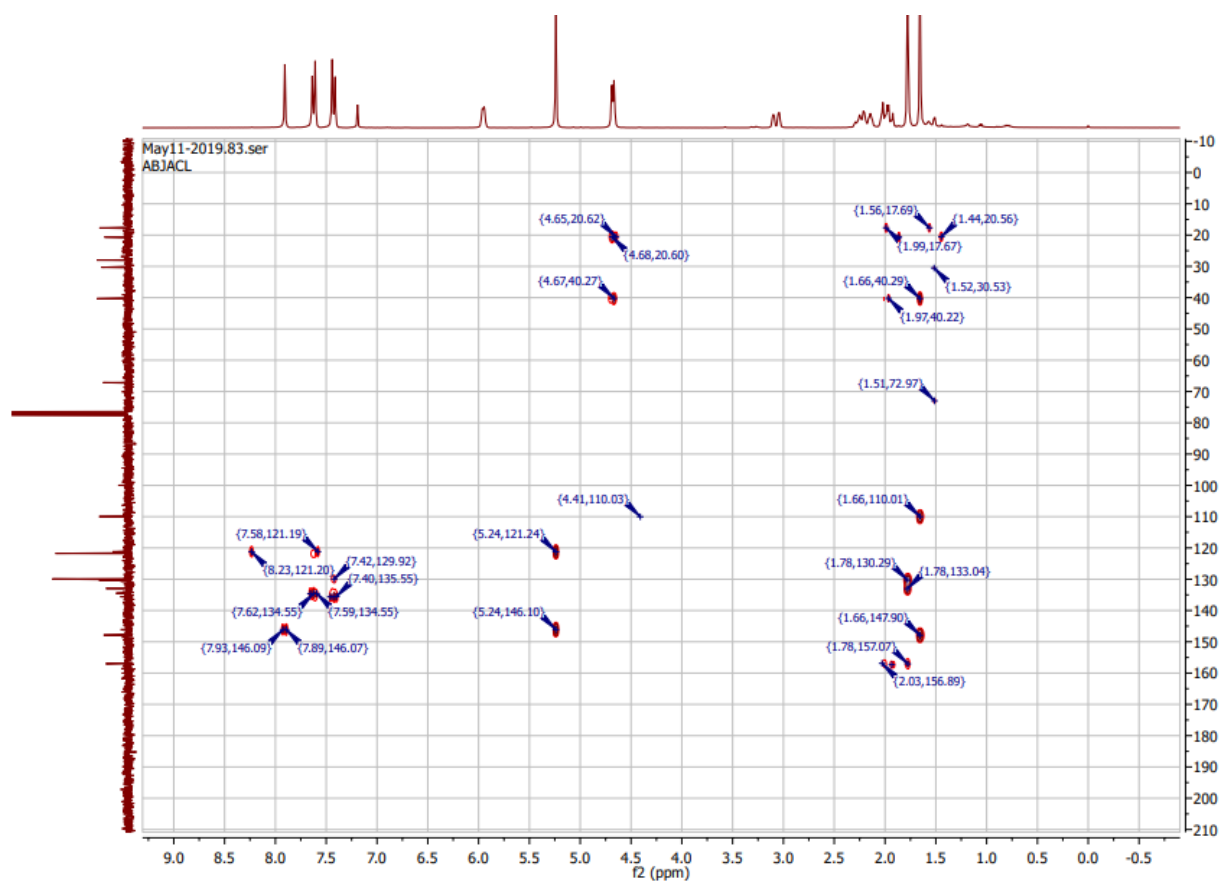

HMBC Spectrum

## HRMS spectrum

### Elemental Composition Report

Page 1

#### Multiple Mass Analysis: 2 mass(es) processed

Tolerance = 5.0 PPM / DBE: min = -1.0, max = 16.0

Element prediction: OH

Number of isotope peaks used for i-FIT = 4

Monoisotopic Mass, Even Electron Ions

827 formula(e) evaluated with 4 results within limits (all results (up to 1000) for each mass)

Elements Used:

C: 0-500 H: 0-1000 N: 0-4 O: 0-4 35Cl: 0-1 37Cl: 0-1

11-Dec-2019

1912126 590 (3.561) Cm (590.591-(559:561+645:646))

AB123

1:9

1: TOF MS ES+  
3.25e+004

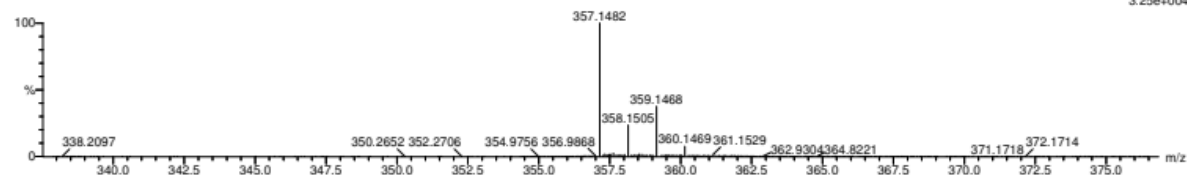

| Minimum: | 30.00  |            |      |      | -1.0 |       |              |                   |      |
|----------|--------|------------|------|------|------|-------|--------------|-------------------|------|
| Maximum: | 100.00 |            | 5.0  | 5.0  | 16.0 |       |              |                   |      |
| Mass     | RA     | Calc. Mass | mDa  | PPM  | DBE  | i-FIT | i-FIT (Norm) | Formula           |      |
| 357.1482 | 100.00 | 357.1482   | 0.0  | 0.0  | 10.5 | 565.5 | 0.6          | C19 H22 N4 O 35Cl |      |
|          |        | 357.1491   | -0.9 | -2.5 | 14.5 | 565.7 | 0.8          | C24 H21 O3        |      |
| 359.1468 | 37.39  | 359.1471   | -0.3 | -0.8 | 5.5  | 542.3 | 0.6          | C18 H27 N2 O 35Cl | 37Cl |
|          |        | 359.1453   | 1.5  | 4.2  | 10.5 | 542.4 | 0.8          | C19 H22 N4 O 37Cl |      |

## 1,2,3-triazole-Carvone 9d:

NMR Spectroscopy (500 MHz, CDCl<sub>3</sub>)

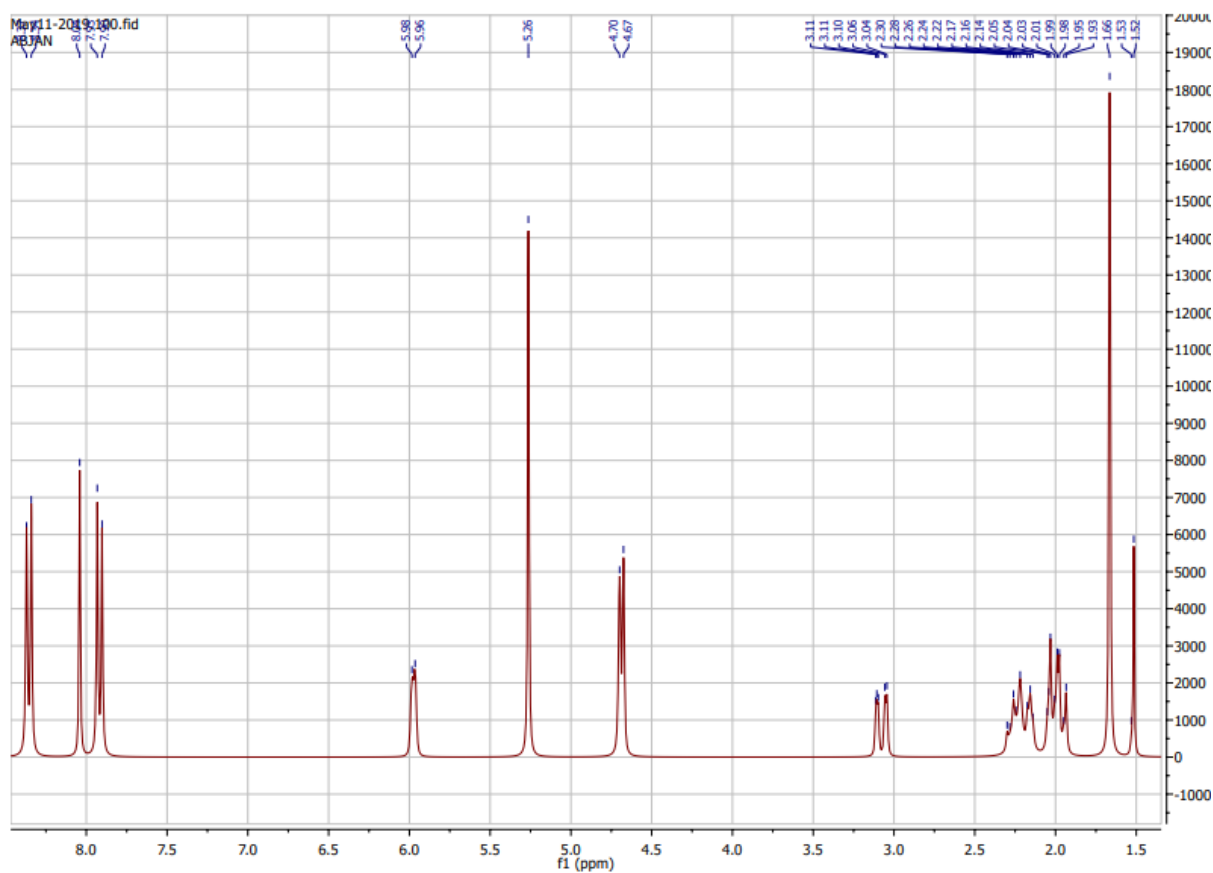

<sup>1</sup>H NMR spectrum

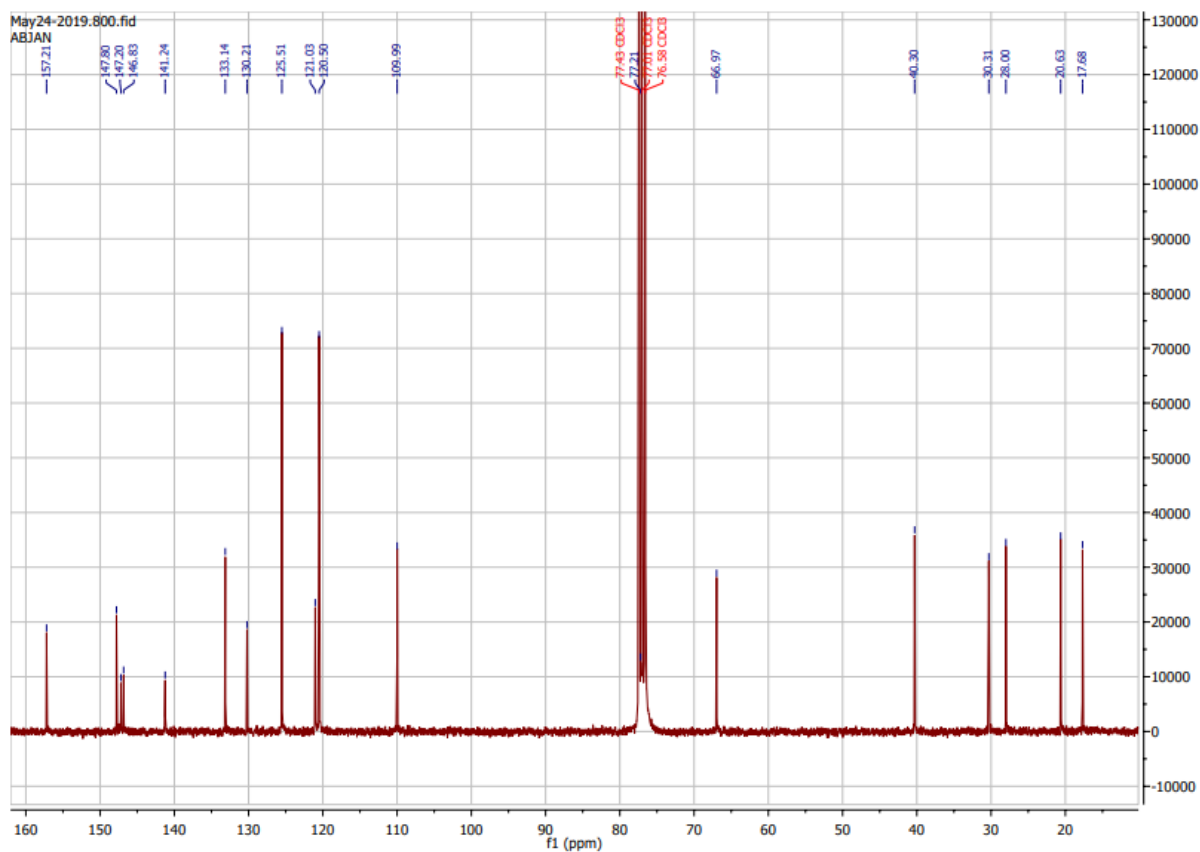

$^{13}\text{C}$  Decoupled  $^1\text{H}$  NMR spectrum

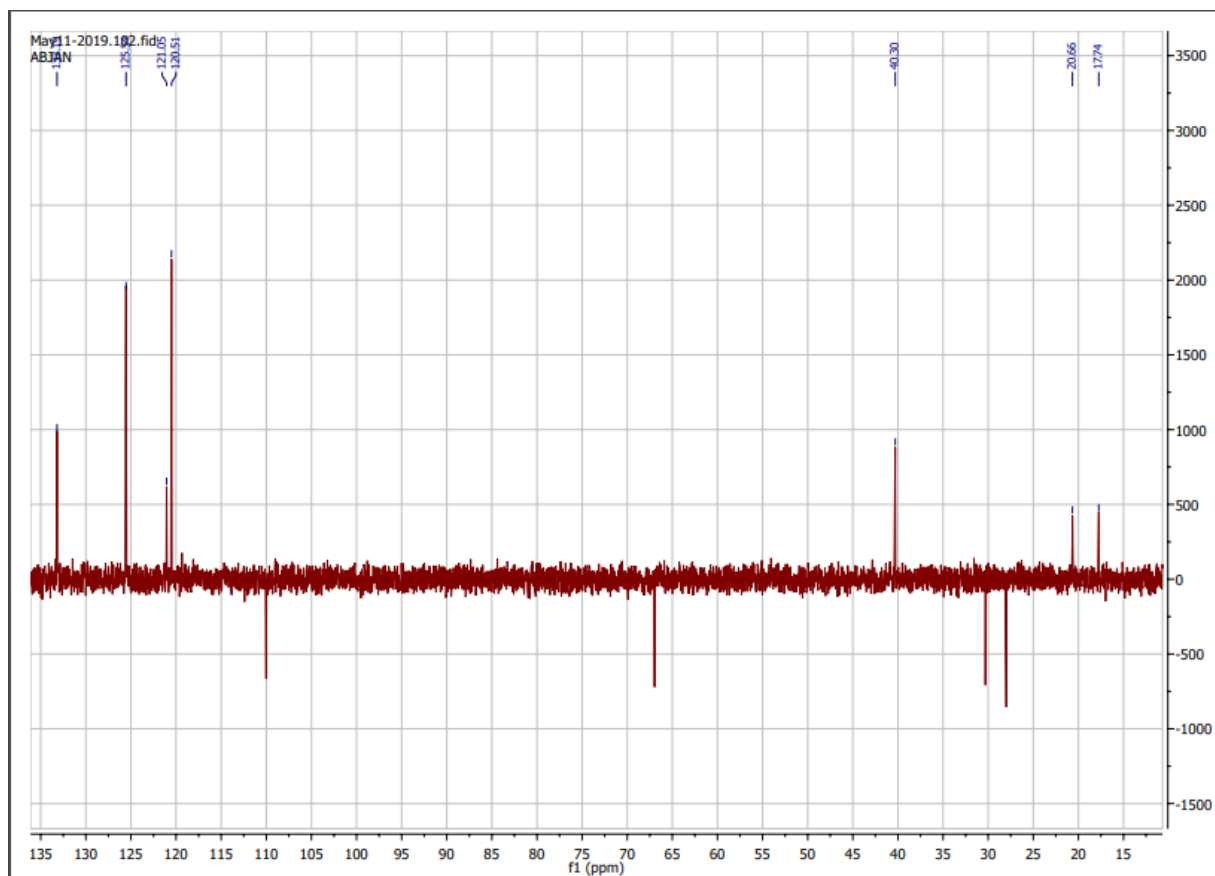

$^{13}\text{C}$  Decoupled  $^1\text{H}$  NMR spectrum DEPT 135 Mode

HRMS spectrum

#### Elemental Composition Report

Page 1

#### Single Mass Analysis

Tolerance = 5.0 PPM / DBE: min = -1.0, max = 16.0

Element prediction: C/H

Number of isotope peaks used for i-FIT = 4

Monoisotopic Mass, Even Electron Ions

162 formula(e) evaluated with 1 results within limits (all results (up to 1000) for each mass)

Elements Used:

C: 0-500 H: 0-1000 N: 0-6 O: 0-4

11-Dec-2019

AB124

1:10

1912127 555 (3.362) Cm (552:555-(512:516+603:605))

1: TOF MS ES+  
1.25e+004

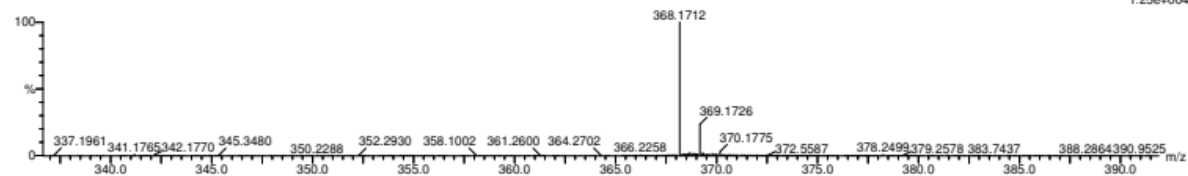

| Minimum: |            |      |      | -1.0 |       |              |         |     |       |
|----------|------------|------|------|------|-------|--------------|---------|-----|-------|
| Maximum: |            | 5.0  | 5.0  | 16.0 |       |              |         |     |       |
| Mass     | Calc. Mass | mDa  | PPM  | DBE  | i-FIT | i-FIT (Norm) | Formula |     |       |
| 368.1712 | 368.1723   | -1.1 | -3.0 | 11.5 | 498.5 | 0.0          | C19     | H22 | N5 O3 |

## 1,2,3-triazole-Carvone 9e:

NMR Spectroscopy (500 MHz, CDCl<sub>3</sub>)

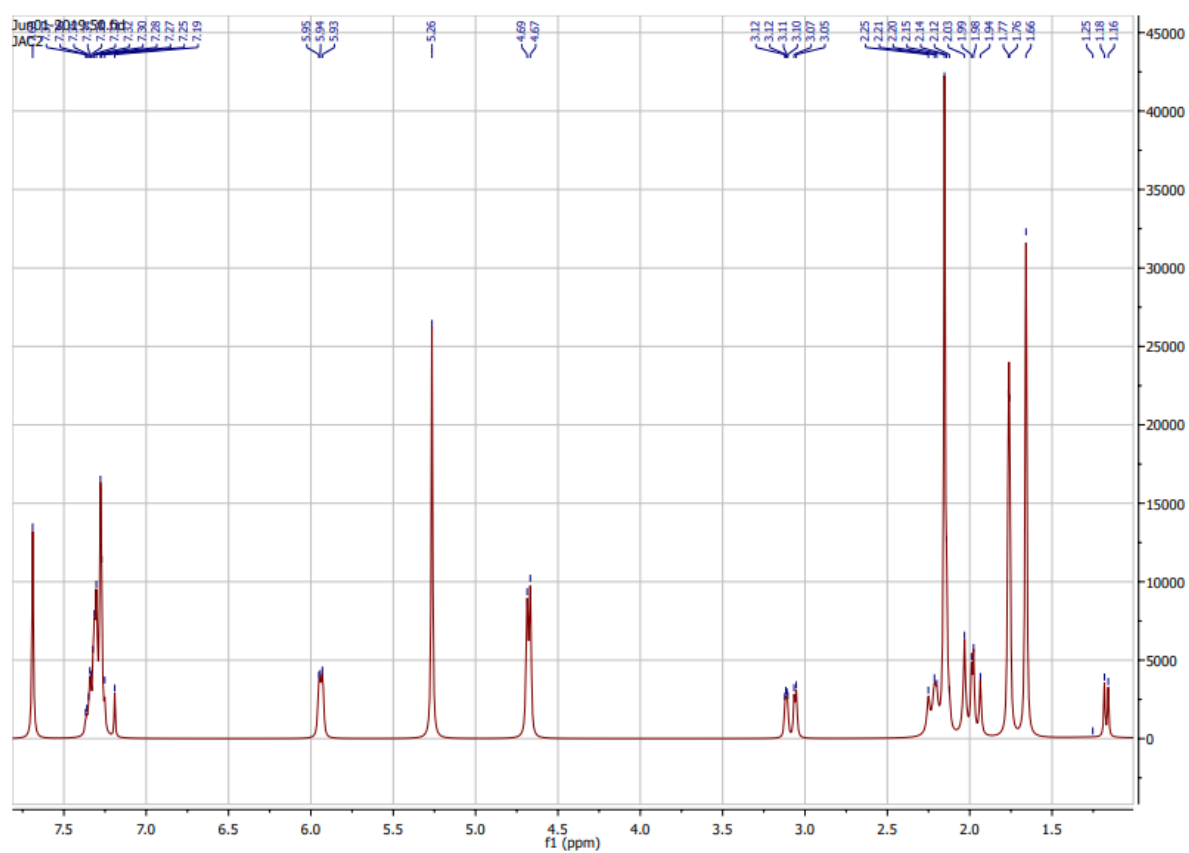

<sup>1</sup>H NMR spectrum



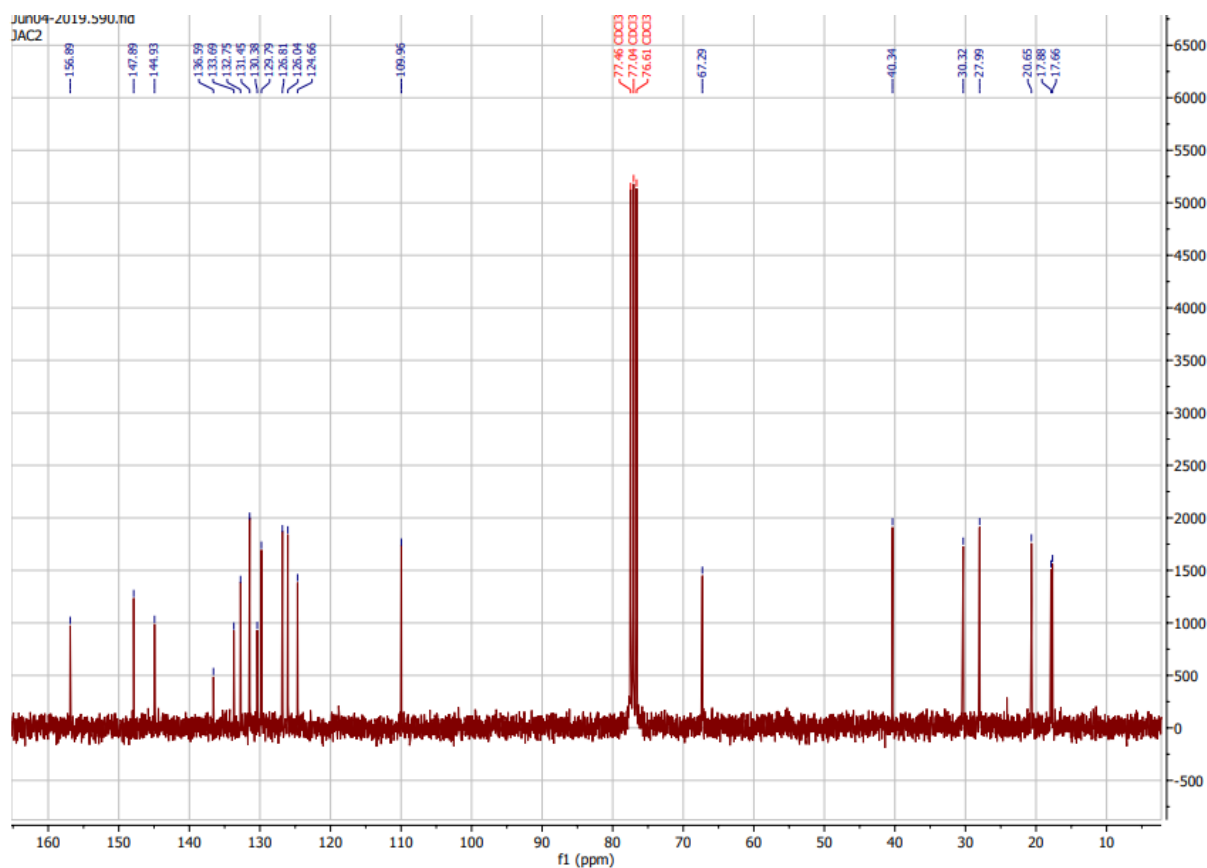

$^{13}\text{C}$  Decoupled  $^1\text{H}$  NMR spectrum

HRMS spectrum

# Elemental Composition Report

Page 1

## Single Mass Analysis

Tolerance = 5.0 PPM / DBE: min = -1.0, max = 16.0

Element prediction: Off

Number of isotope peaks used for i-FIT = 4

Monoisotopic Mass, Even Electron Ions

97 formula(e) evaluated with 1 results within limits (all results (up to 1000) for each mass)

Elements Used:

C: 0-500 H: 0-1000 N: 0-6 O: 0-2

11-Dec-2019

1912130 571 (3.442) Cm (571.572-536:537+618:619))

AB127

1:13

1: TOF MS ES+  
6.12e+003

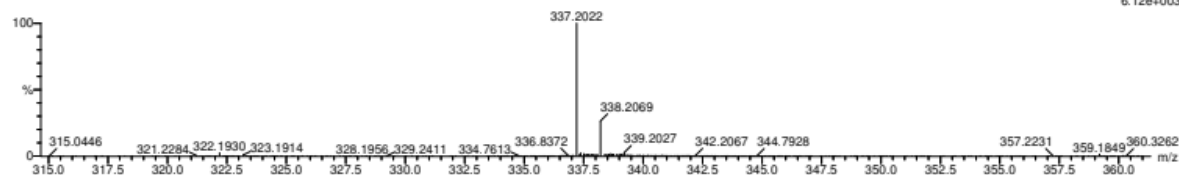

Minimum:

Maximum:

| Mass     | Calc. Mass | mDa  | PPM  | DBE  | i-FIT | i-FIT (Norm) | Formula      |
|----------|------------|------|------|------|-------|--------------|--------------|
| 337.2022 | 337.2028   | -0.6 | -1.8 | 10.5 | 374.6 | 0.0          | C20 H25 N4 O |

## 1,2,3-triazole-Carvone 9f:

NMR Spectroscopy (500 MHz, CDCl<sub>3</sub>)

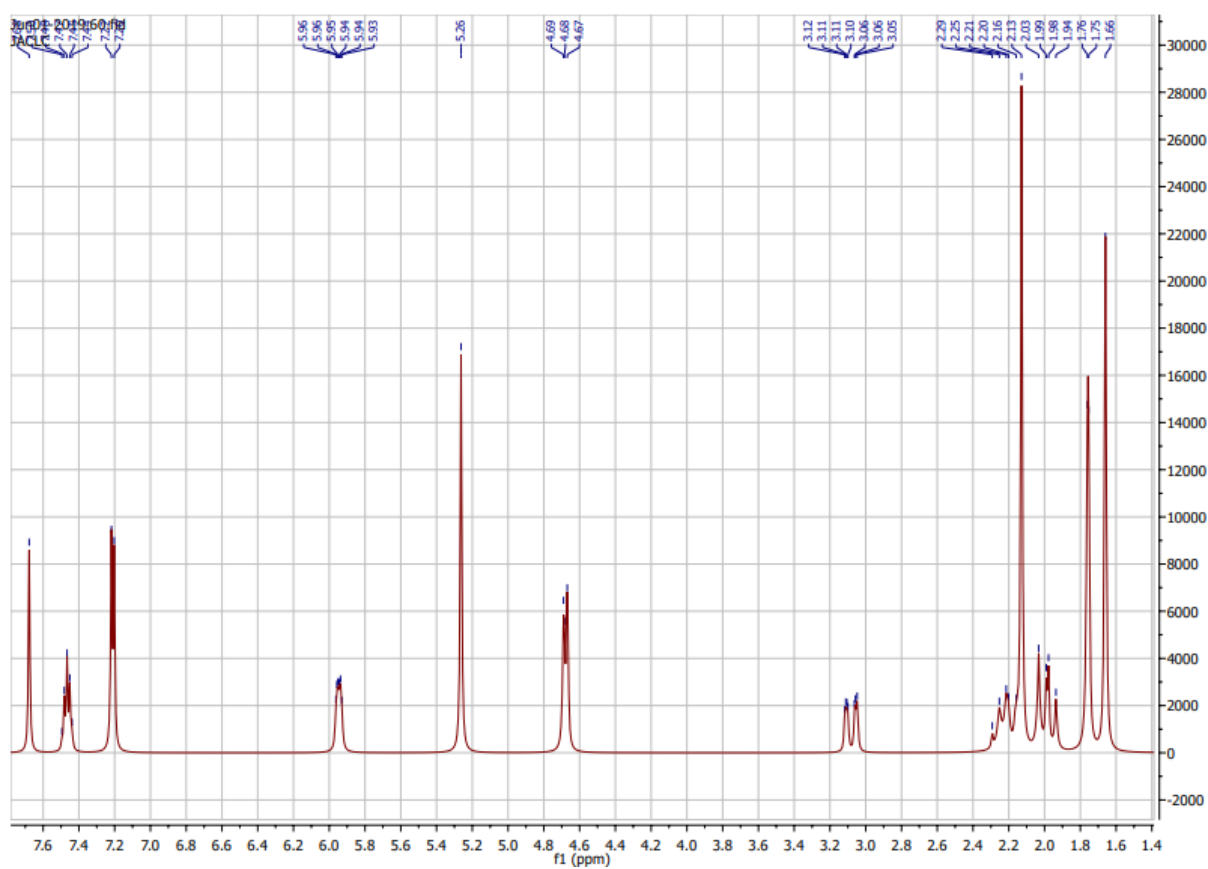

<sup>1</sup>H NMR spectrum

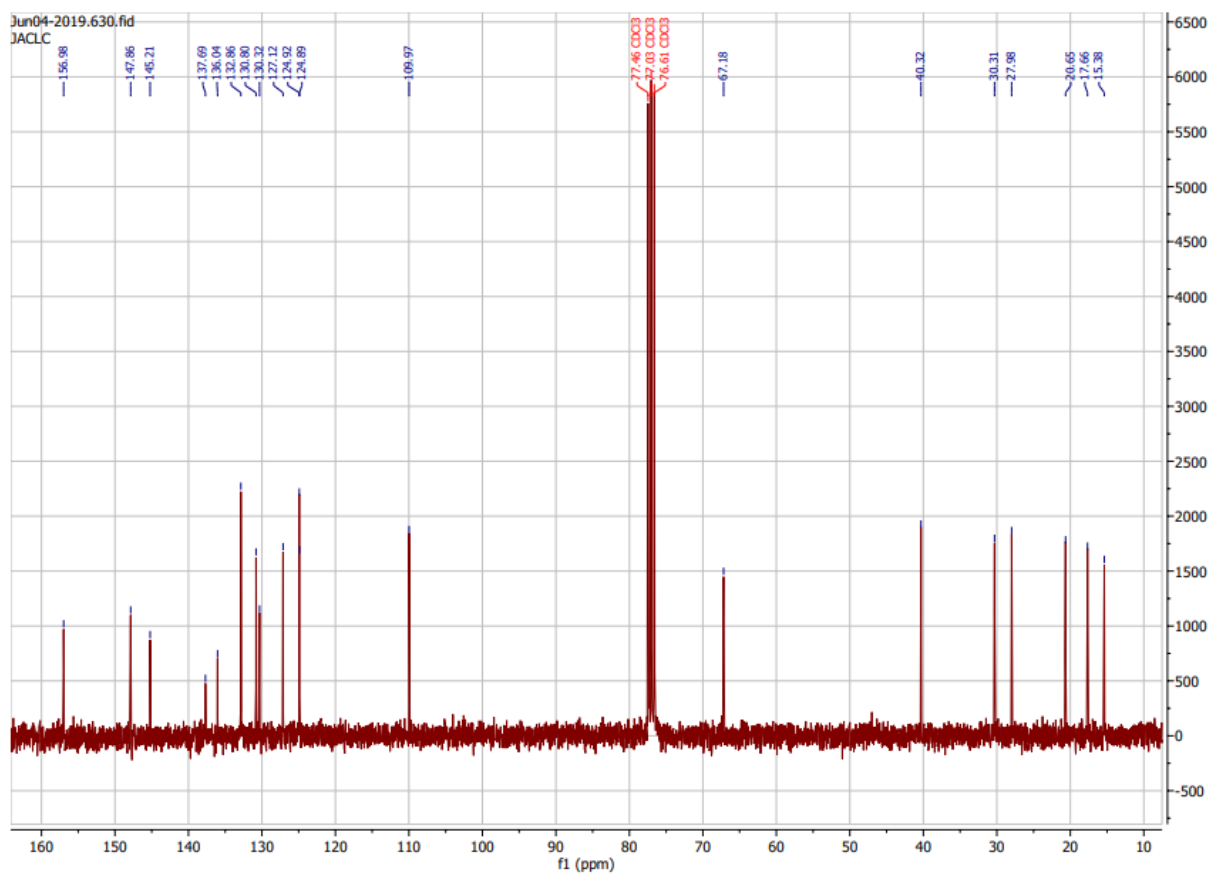

$^{13}\text{C}$  Decoupled  $^1\text{H}$  NMR spectrum

HRMS spectrum

## Multiple Mass Analysis: 2 mass(es) processed

Tolerance = 5.0 PPM / DBE: min = -1.0, max = 16.0

Element prediction: Off

Number of isotope peaks used for i-FIT = 4

Monoisotopic Mass, Even Electron Ions

739 formula(e) evaluated with 4 results within limits (all results (up to 1000) for each mass)

Elements Used:

C: 0-500 H: 0-1000 N: 0-6 O: 0-2 <sup>35</sup>Cl: 0-1 <sup>37</sup>Cl: 0-1

11-Dec-2019

1912129 605 (3.633) Cm (602:605-(571:573+665:667))

AB126

1:12

1: TOF MS ES+  
1.36e+004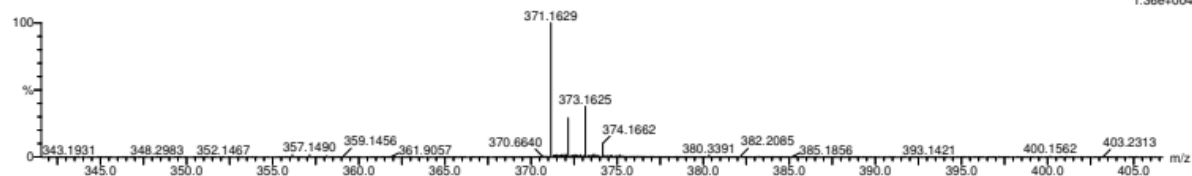

Minimum: 30.00  
Maximum: 100.00

| Mass     | RA     | Calc. Mass | mDa  | PPM  | DBE  | i-FIT | i-FIT (Norm) | Formula                                        |
|----------|--------|------------|------|------|------|-------|--------------|------------------------------------------------|
| 371.1629 | 100.00 | 371.1620   | 0.9  | 2.4  | 15.5 | 541.0 | 0.4          | C21 H19 N6 O                                   |
|          |        | 371.1639   | -1.0 | -2.7 | 10.5 | 541.7 | 1.1          | C20 H24 N4 O <sup>35</sup> Cl                  |
| 373.1625 | 37.60  | 373.1609   | 1.6  | 4.3  | 10.5 | 434.8 | 0.1          | C20 H24 N4 O <sup>37</sup> Cl                  |
|          |        | 373.1627   | -0.2 | -0.5 | 5.5  | 436.7 | 2.0          | C19 H29 N2 O <sup>35</sup> Cl <sup>37</sup> Cl |

## 1,2,3-triazole-Carvone 9g:

NMR Spectroscopy (500 MHz, CDCl<sub>3</sub>)

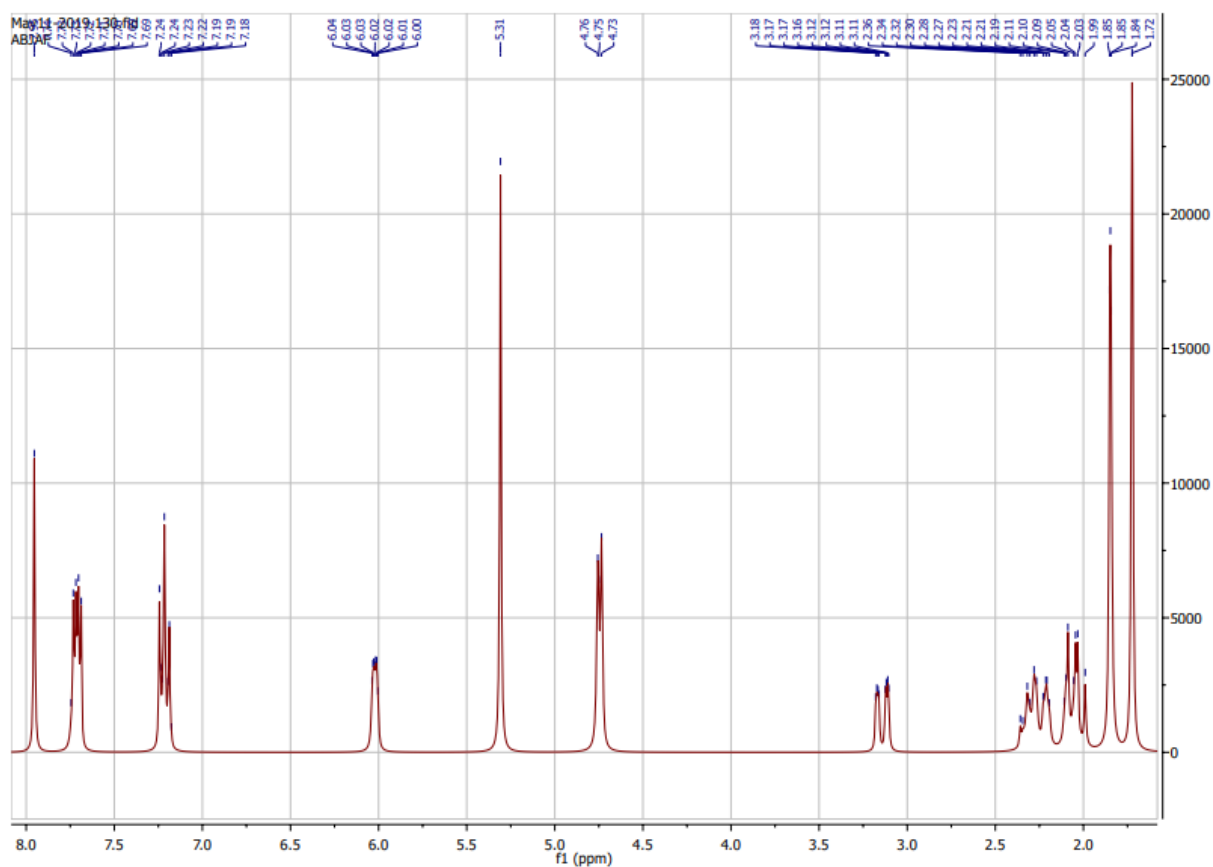

$^1\text{H}$  NMR spectrum

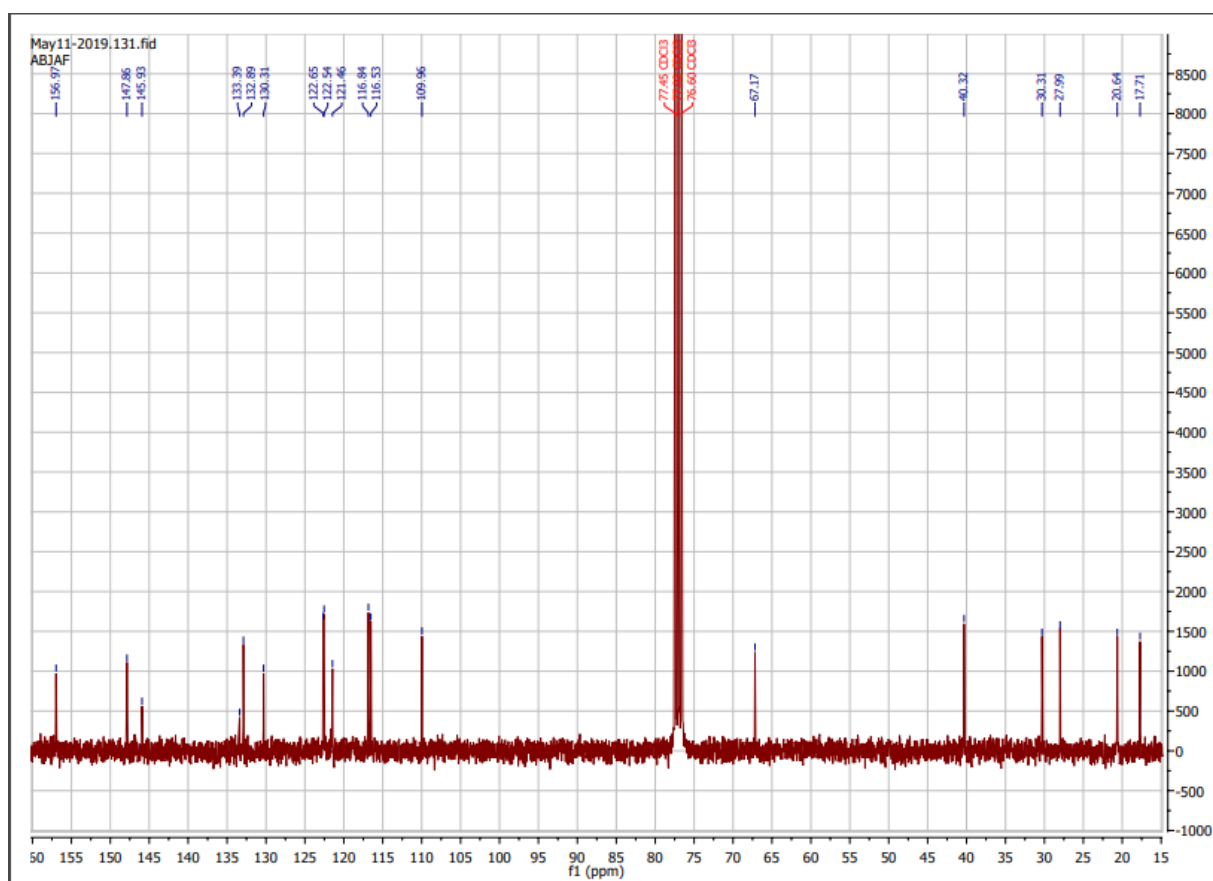

# $^{13}\text{C}$ Decoupled $^1\text{H}$ NMR spectrum

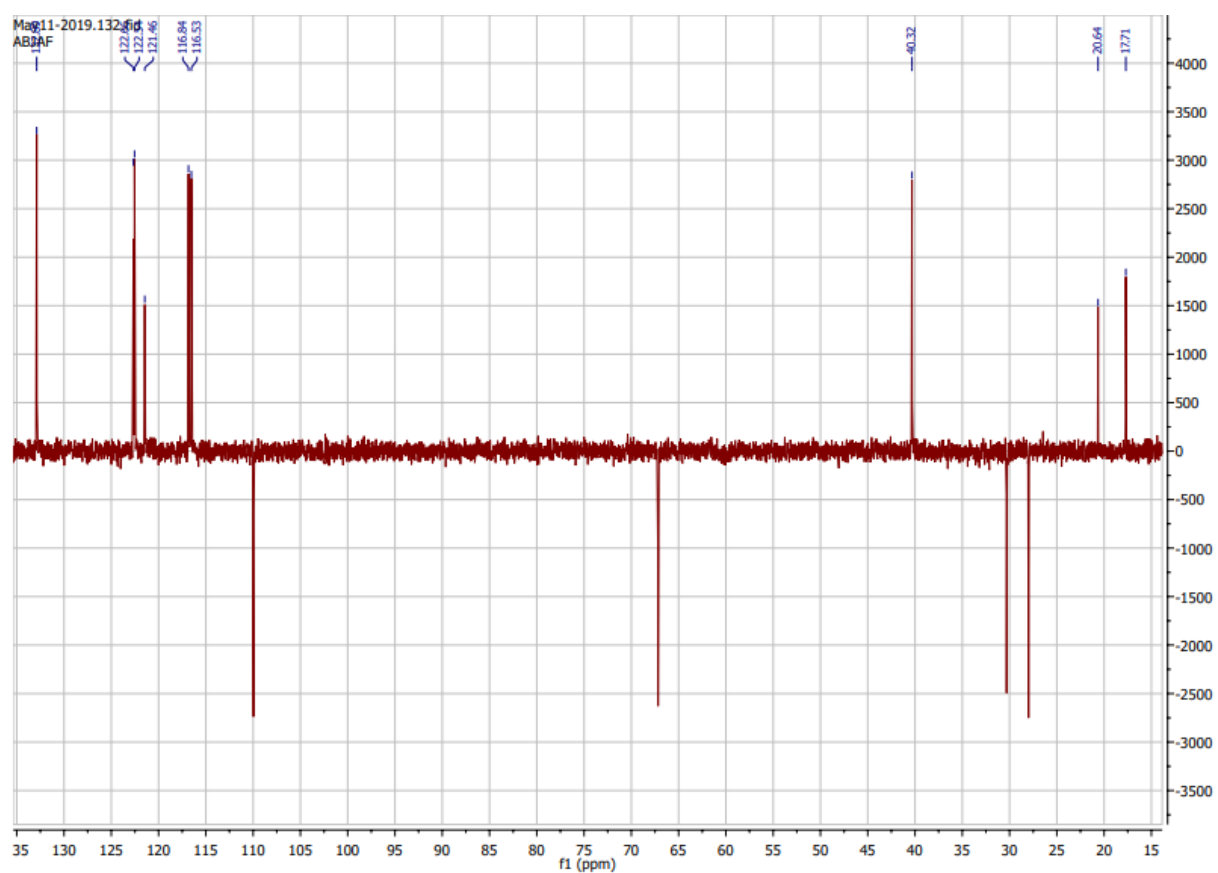

## $^{13}\text{C}$ Decoupled $^1\text{H}$ NMR spectrum DEPT 135 Mode

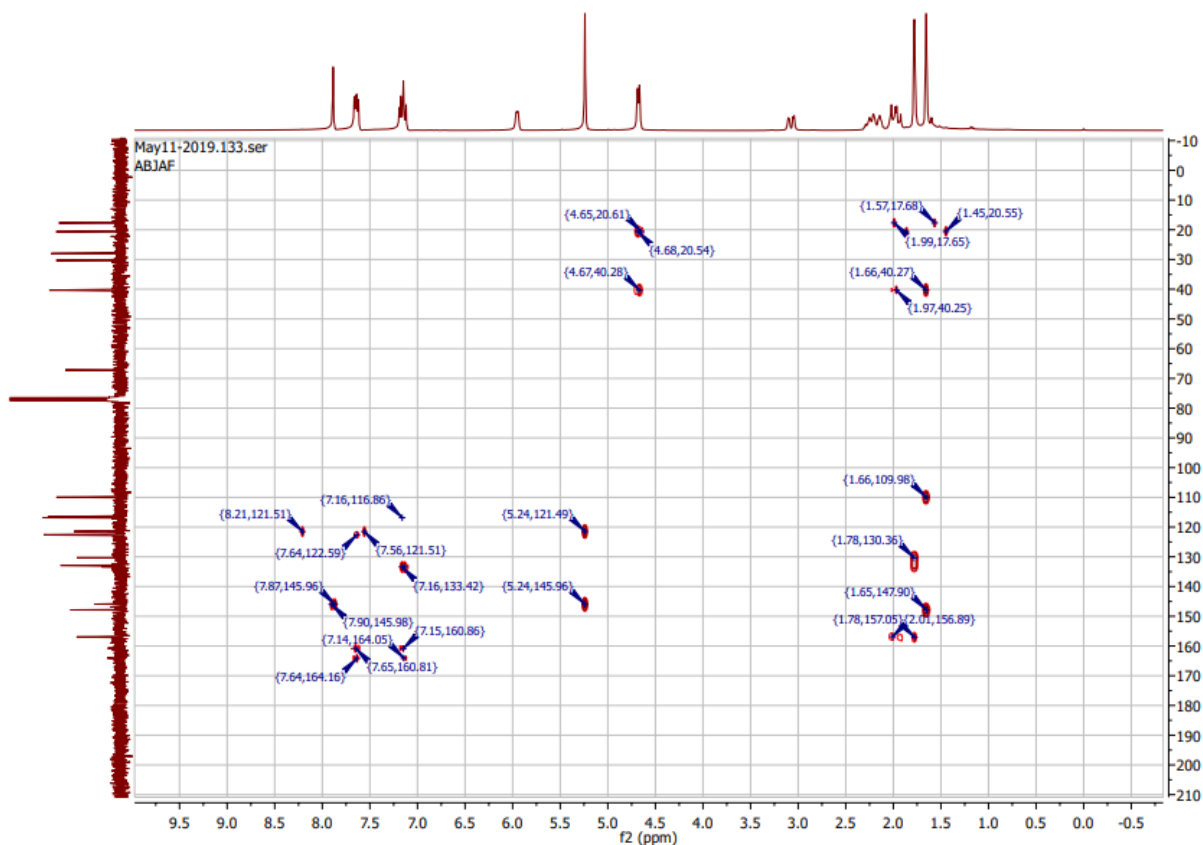

HMBC Spectrum

HRMS spectrum

# Elemental Composition Report

Page 1

## Single Mass Analysis

Tolerance = 5.0 PPM / DBE: min = -1.0, max = 16.0

Element prediction: Off

Number of isotope peaks used for i-FIT = 4

Monoisotopic Mass, Even Electron Ions

295 formula(e) evaluated with 2 results within limits (all results (up to 1000) for each mass)

Elements Used:

C: 0-500 H: 0-1000 N: 0-6 O: 0-4 F: 0-1

AB125

1:11

11-Dec-2019

1912128 553 (3.357) Cm (552:558-(517:520+592:594))

1: TOF MS ES+  
2.79e+004

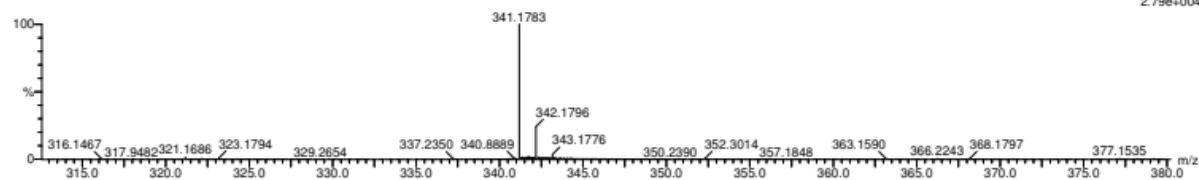

Minimum:

Maximum:

| Mass     | Calc. Mass | mDa | PPM | DBE  | i-FIT | i-FIT (Norm) | Formula        |
|----------|------------|-----|-----|------|-------|--------------|----------------|
| 341.1783 | 341.1778   | 0.5 | 1.5 | 10.5 | 698.3 | 0.6          | C19 H22 N4 O F |
|          | 341.1766   | 1.7 | 5.0 | 14.5 | 698.6 | 0.8          | C22 H21 N4     |

### 1,2,3-triazole-Carvone 9h:

NMR Spectroscopy (500 MHz, CDCl<sub>3</sub>)

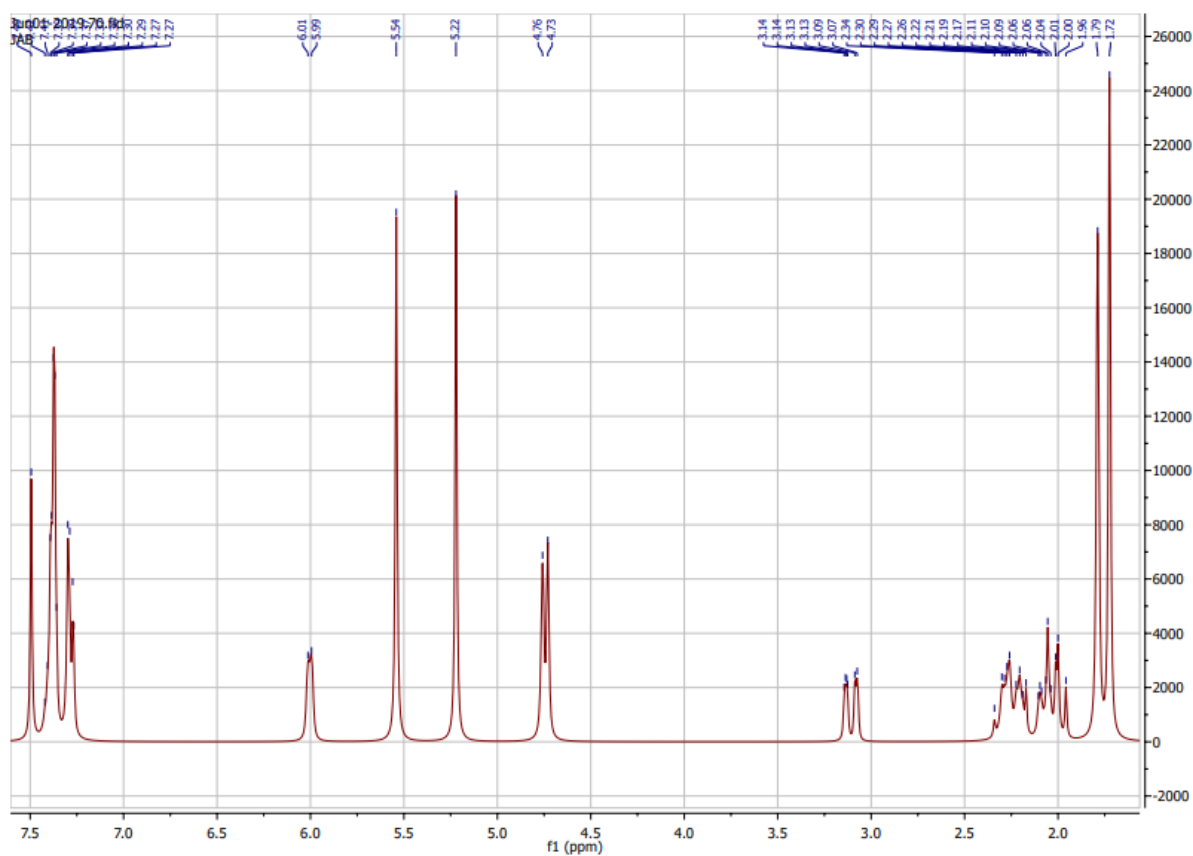<sup>1</sup>H NMR spectrum



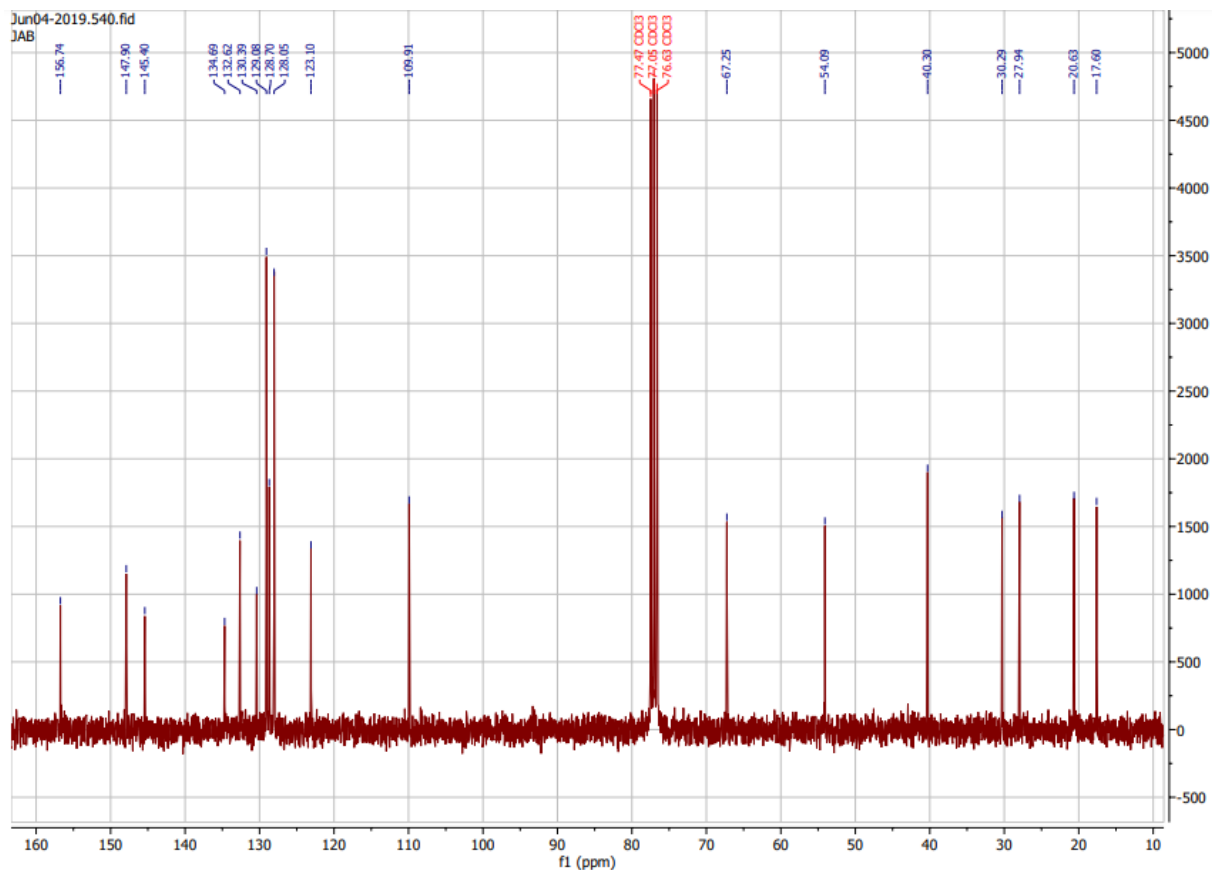

$^{13}\text{C}$  Decoupled  $^1\text{H}$  NMR spectrum

HRMS spectrum

#### Elemental Composition Report

Page 1

##### Single Mass Analysis

Tolerance = 5.0 PPM / DBE: min = -1.0, max = 16.0

Element prediction: Off

Number of isotope peaks used for i-FIT = 4

Monoisotopic Mass, Even Electron Ions

97 formula(e) evaluated with 1 results within limits (all results (up to 1000) for each mass)

Elements Used:

C: 0-500 H: 0-1000 N: 0-6 O: 0-2

11-Dec-2019

AB128

1:14

1912131 527 (3.199) Cm (525:531-(486:493+609:613))

1: TOF MS ES+  
1.06e+005

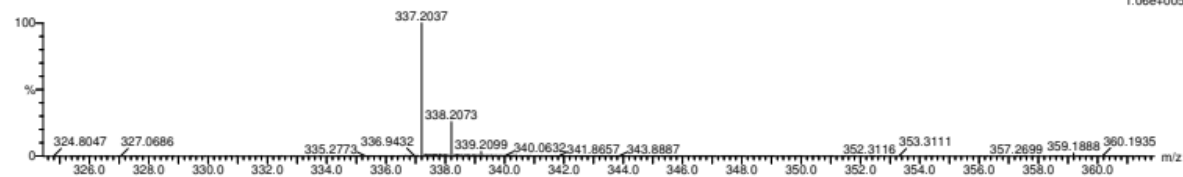

Minimum:

Maximum:

| Mass     | Calc. Mass | mDa | PPM | DBE  | i-FIT | i-FIT (Norm) | Formula                                          |
|----------|------------|-----|-----|------|-------|--------------|--------------------------------------------------|
| 337.2037 | 337.2028   | 0.9 | 2.7 | 10.5 | 874.2 | 0.0          | C <sub>20</sub> H <sub>25</sub> N <sub>4</sub> O |

## II- Calculated Supporting Information

**Table S1.** The calculated energies (**E**, a.u), zero-point vibrational energies (**ZPE**, a.u), thermal corrections (**TCE**, a.u), entropy values (**S**, cal/mol/K), ZPE corrected energies (**Ecorr**, a.u), enthalpies (**H**, a.u), and **TΔS** (a.u), at 25°C, for all possible regioisomers of the 32CA between **7** and **8a**.

|             | <b>E</b>    | <b>ZPE</b> | <b>TCE</b> | <b>S</b> | <b>Ecorr</b> | <b>H</b>    | <b>TΔS</b>  |
|-------------|-------------|------------|------------|----------|--------------|-------------|-------------|
| <b>7</b>    | -635.43563  | 0.27064    | 0.28775    | 130.072  | -635.17024   | -635.15313  |             |
| <b>8a</b>   | -395.83829  | 0.10381    | 0.11174    | 83.866   | -395.73649   | -395.72857  |             |
| <b>TS-1</b> | -1031.24700 | 0.37528    | 0.40009    | 173.479  | -1030.87900  | -1030.85419 | -0.01922305 |
| <b>TS-2</b> | -1031.24806 | 0.37579    | 0.40032    | 171.931  | -1030.87956  | -1030.85503 | -0.04058227 |
| <b>9a-1</b> | -1031.38420 | 0.38224    | 0.40555    | 166.487  | -1031.00937  | -1030.98606 | -0.08501066 |
| <b>9a-2</b> | -1031.38213 | 0.38291    | 0.40591    | 164.796  | -1031.00665  | -1030.98365 | -0.08249203 |
| <b>TS-3</b> | -1031.21294 | 0.37511    | 0.39945    | 166.017  | -1030.84511  | -1030.82077 | -0.07852189 |
| <b>TS-4</b> | -1031.22323 | 0.37575    | 0.39994    | 165.163  | -1030.85477  | -1030.83057 | -0.07870434 |
| <b>9a-3</b> | -1031.25331 | 0.37819    | 0.40207    | 162.967  | -1030.88245  | -1030.85857 | -0.07992208 |
| <b>9a-4</b> | -1031.25614 | 0.37885    | 0.40262    | 162.891  | -1030.88465  | -1030.86088 | -0.07850906 |
| <b>TS-5</b> | -1031.24122 | 0.37561    | 0.40012    | 167.563  | -1030.87289  | -1030.84839 | -0.0752098  |
| <b>TS-6</b> | -1031.23907 | 0.37590    | 0.40029    | 167.439  | -1030.87046  | -1030.84608 | -0.07745239 |
| <b>9a-5</b> | -1031.31033 | 0.38054    | 0.40425    | 165.092  | -1030.93717  | -1030.91346 | -0.08072837 |
| <b>9a-6</b> | -1031.29802 | 0.38035    | 0.40392    | 161.977  | -1030.92504  | -1030.90147 | -0.08103435 |
| <b>TS-7</b> | -1031.23639 | 0.37507    | 0.39980    | 171.549  | -1030.86858  | -1030.84386 | -0.07389133 |
| <b>TS-8</b> | -1031.23972 | 0.37537    | 0.40000    | 169.726  | -1030.87163  | -1030.84700 | -0.07782536 |
| <b>9a-7</b> | -1031.29455 | 0.37978    | 0.40352    | 163.765  | -1030.92214  | -1030.89840 | -0.08433931 |
| <b>9a-8</b> | -1031.28996 | 0.38019    | 0.40373    | 162.19   | -1030.91714  | -1030.89360 | -0.08138927 |

**Table S2.** Energies ( $\Delta E$ ), enthalpies ( $\Delta H$ ) and Gibbs free energies ( $\Delta G$ ) for stationary points of all possible regioisomers of the 32CA between **7** and **8a** relative to the separate reactants. All values are in kcal/mol.

|             | $\Delta E$ | $\Delta H$ | $\Delta G$ |
|-------------|------------|------------|------------|
| <b>TS-1</b> | 17.407     | 17.265     | 17.284     |
| <b>TS-2</b> | 17.053     | 16.739     | 16.780     |
| <b>9a-1</b> | -64.408    | -65.490    | -65.405    |
| <b>9a-2</b> | -62.702    | -63.976    | -63.893    |
| <b>TS-3</b> | 38.668     | 38.233     | 38.312     |
| <b>TS-4</b> | 32.611     | 32.084     | 32.163     |
| <b>9a-3</b> | 15.238     | 14.515     | 14.595     |
| <b>9a-4</b> | 13.860     | 13.068     | 13.147     |
| <b>TS-5</b> | 21.238     | 20.906     | 20.981     |
| <b>TS-6</b> | 22.763     | 22.355     | 22.433     |
| <b>9a-5</b> | -19.100    | -19.931    | -19.850    |
| <b>9a-6</b> | -11.488    | -12.406    | -12.325    |
| <b>TS-7</b> | 23.940     | 23.746     | 23.820     |
| <b>TS-8</b> | 22.026     | 21.773     | 21.851     |
| <b>9a-7</b> | -9.666     | -10.479    | -10.394    |
| <b>9a-8</b> | -6.530     | -7.469     | -7.387     |

**Table S3.** The calculated energies (**E**. a.u). zero-point vibrational energies (**ZPE**. a.u). thermal corrections (**TCE**. a.u). entropy values (**S**. cal/mol/K). ZPE corrected energies (**Ecorr**. a.u). enthalpies (**H**. a.u). and **TΔS** (a.u). at 25°C. for all possible regioisomers of the 32CA between **2Cu(I)-7** and **8a**.

|                 | <b>E</b>     | <b>ZPE</b> | <b>TCE</b> | <b>S</b> | <b>Ecorr</b> | <b>H</b>    | <b>TΔS</b>  |
|-----------------|--------------|------------|------------|----------|--------------|-------------|-------------|
| <b>8a</b>       | -395.838289  | 0.103814   | 0.111737   | 83.867   | -395.736489  | -395.728566 |             |
| <b>2Cu(I)-7</b> | -4225.412542 | 0.430132   | 0.460296   | 199.455  | -4224.99076  | -4224.96059 |             |
| <b>1.4-RC</b>   | -4621.27622  | 0.534827   | 0.57387    | 246.549  | -4620.75177  | -4620.71272 | -0.01747175 |
| <b>1.4-TS1</b>  | -4621.26758  | 0.534912   | 0.572319   | 234.747  | -4620.74305  | -4620.70564 | -0.10037333 |
| <b>1.4-In</b>   | -4621.29405  | 0.537219   | 0.574408   | 233.133  | -4620.76726  | -4620.73007 | -0.11790827 |
| <b>1.4-TS2</b>  | -4621.27158  | 0.536125   | 0.573163   | 232.73   | -4620.74586  | -4620.70882 | -0.11172548 |
| <b>1.4-P</b>    | -4621.34718  | 0.539105   | 0.576523   | 239.273  | -4620.81854  | -4620.78112 | -0.10765841 |
| <b>1.5-RC</b>   | -4621.27893  | 0.533908   | 0.57343    | 254.087  | -4620.75538  | -4620.71586 | 0.00703849  |
| <b>1.5-TS1</b>  | -4621.23078  | 0.533744   | 0.572235   | 247.335  | -4620.70739  | -4620.6689  | -0.00320804 |
| <b>1.5-In</b>   | -4621.28796  | 0.536903   | 0.574561   | 237.412  | -4620.76147  | -4620.72381 | -0.12543757 |
| <b>1.5-TS2</b>  | -4621.28313  | 0.536343   | 0.573377   | 234.29   | -4620.75719  | -4620.72016 | -0.11899821 |
| <b>1.5-P</b>    | -4621.33895  | 0.538707   | 0.576139   | 238.625  | -4620.81069  | -4620.77326 | -0.11074055 |

**Table S4.** Energies (**E**. a.u), zero-point vibrational energies (**ZPE**. a.u), thermal corrections (**TCE**. a.u), entropy values (**S**. cal/mol/K), ZPE corrected energies (**Ecorr**. a.u), enthalpies (**H**. a.u) and **TΔS** (a.u) at 25°C calculated at B3LYP/6-31G\* in ethanol as solvent using the PCM model for the stationary points of the two regioisomers 1,4 and 1,5-disubstituted 1,2,3-triazole of the 32CA between **2Cu(I)-7** and **8a**.

|                 | <b>E</b>     | <b>ZPE</b> | <b>TCE</b> | <b>S</b> | <b>Ecorr</b> | <b>H</b>    | <b>TΔS</b>  |
|-----------------|--------------|------------|------------|----------|--------------|-------------|-------------|
| <b>8a</b>       | -395.8419542 | 0.103804   | 0.111716   | 83.789   | -395.740164  | -395.732252 |             |
| <b>2Cu(I)-7</b> | -4225.472218 | 0.429337   | 0.458749   | 192.891  | -4225.05121  | -4225.0218  |             |
| <b>1.4-RC</b>   | -4621.331064 | 0.533722   | 0.573069   | 253.554  | -4620.8077   | -4620.76835 | -0.01098772 |
| <b>1.4-TS1</b>  | -4621.324008 | 0.533819   | 0.570615   | 231.42   | -4620.80054  | -4620.76375 | -0.1021636  |
| <b>1.4-In</b>   | -4621.361224 | 0.536504   | 0.572105   | 221.902  | -4620.83513  | -4620.79953 | -0.1249919  |
| <b>1.4-TS2</b>  | -4621.337476 | 0.535647   | 0.571819   | 226.536  | -4620.81222  | -4620.77605 | -0.10775154 |
| <b>1.4-P</b>    | -4621.415718 | 0.538801   | 0.576204   | 236.829  | -4620.88737  | -4620.84997 | -0.10054058 |
| <b>1.5-RC</b>   | -4621.336682 | 0.533083   | 0.571901   | 253.166  | -4620.81394  | -4620.77512 | -0.01117207 |
| <b>1.5-TS1</b>  | -4621.299033 | 0.532856   | 0.569734   | 235.308  | -4620.77651  | -4620.73964 | -0.10031632 |
| <b>1.5-In</b>   | -4621.349428 | 0.536167   | 0.574034   | 240.744  | -4620.82366  | -4620.7858  | -0.11603961 |
| <b>1.5-TS2</b>  | -4621.342388 | 0.535526   | 0.570044   | 216.541  | -4620.81725  | -4620.78273 | -0.11250041 |
| <b>1.5-P</b>    | -4621.403118 | 0.538063   | 0.573786   | 225.281  | -4620.87549  | -4620.83977 | -0.10602731 |
